# Supplementary material for: R-VAPOL-phosphoric acid based 1H and 13C-NMR for sensing of chiral amines and acids
Source: PubMed Central journal article supplement — RSC Adv. 2020 Jan 13;10(4):2303–12. doi: 10.1039/c9ra07803g (PMC9048436; doi:10.1039/c9ra07803g), 2020-01-13
Supplement: RA-010-C9RA07803G-s001.pdf [file RA-010-C9RA07803G-s001.pdf]

## Supporting Information

### ***R*-VAPOL-Phosphoric Acid based $^1\text{H}$ and $^{13}\text{C}$ -NMR for Sensing of Chiral Amines and Acids**

Durga Prasad,<sup>[a]</sup> Santosh Mogurampelly,<sup>[b]</sup> Sachin R. Chaudhari,<sup>[a]\*</sup>

*<sup>a</sup>Department of Spice and Flavour Science, CSIR-Central for Food Science and Technological Institute, Mysore, Karnataka, India.*

*<sup>b</sup>Department of Physics, Indian Institute of Technology Jodhpur, Karwar, Rajasthan, India, 342037*

**Simulation methods:** The first-principles density functional theory (DFT) calculations were carried out using the Quantum Espresso software package.<sup>[1]</sup> The interatomic forces were derived within the framework of density functional theory (DFT) using the Perdew, Burke and Ernzerhof (PBE) - GGA approximation for the exchange-correlation energy functional.<sup>[2]</sup> The interaction between valence electrons and ionic cores was represented by the Troullier-Martin norm-conserving pseudopotentials.<sup>[3]</sup> The van der Waals dispersion corrections were treated using the Tkatchenko-Scheffler parameters.<sup>[4]</sup> The Brillouin zone was sampled at the gamma point. We performed the convergence test of the kinetic energy cutoff for the electronic wavefunctions and the charge density. The optimized values of kinetic energy cutoff of electronic wavefunctions and charge density are 70 and 280 Ry, respectively. The electronic kinetic energy convergence criteria used is  $10^{-10}$ . A vacuum of at least 10 Å in each direction was introduced to simulate an isolated system. Martyna-Tuckerman corrections to the total energy and SCF potential were included.<sup>[5]</sup> All energetics reported in the paper are in kcal/mol and coordinates/bond lengths in angstroms (Å). Snapshots of the optimized geometries were generated using CYLview.<sup>[6]</sup>

---

## References

- [1] P. Giannozzi, S. Baroni, N. Bonini, M. Calandra, R. Car, C. Cavazzoni, D. Ceresoli, G. L. Chiarotti, M. Cococcioni, I. Dabo, A. Dal Corso, S. Fabris, G. Fratesi, S. de Gironcoli, R. Gebauer, U. Gerstmann, C. Gougoussis, A. Kokalj, M. Lazzeri, L. Martin-Samos, N. Marzari, F. Mauri, R. Mazzarello, S. Paolini, A. Pasquarello, L. Paulatto, C. Sbraccia, S. Scandolo, G. Sclauzero, A. P. Seitsonen, A. Smogunov, P. Umari, R. M. Wentzcovitch, *J. Phys.: Condens. Matter* **21**, 395502 (2009)
- [2] J. P. Perdew, K. Burke, M. Ernzerhof, Generalized gradient approximation made simple. *Phys. Rev. Lett.* **77**, 3865-3868 (1996)
- [3] Troullier, N. & Martins, J. Efficient pseudopotentials for plane-wave calculations. *Phys. Rev. B* **43**, 1993–2006 (1991)
- [4] Tkatchenko, A.; Scheffler, M., Accurate molecular van der Waals interactions from ground-state electron density and free-atom reference data. *Phys. Rev. Lett.* **2009**, *102* (7), 073005
- [5] G.J. Martyna, and M.E. Tuckerman, "A reciprocal space-based method for treating long-range interactions in ab-initio and force-field-based calculation in clusters", *J. Chem. Phys.* **110**, 2810 (1999)

[6] CYLview, 1.0b; Legault, C. Y. Université de Sherbrooke, 2009.  
(<http://www.cylview.org>).

Table S1: Comparisons of the chemical shift difference

| CSA                       | Analyte: 1-amino-indane ( $\Delta\delta^{R/S}$ )                        |                                       |
|---------------------------|-------------------------------------------------------------------------|---------------------------------------|
|                           | $^1\text{H}$ (Hz)                                                       | $^{13}\text{C}$ (Hz)                  |
| <i>R</i> -BINOL           | 15.12 Hz (1), 17.57 Hz (3), 4.6 Hz (3'), 6.05 Hz (2), 28.08 Hz (2')     | 0 (No discrimination observed)        |
| <i>R</i> -PA <sup>I</sup> | 7.6 Hz (1), 50.4 Hz (3), 22.75 Hz (3'), 34.8 Hz (2), 38.2 Hz (2')       | 6.02 Hz (1), 9.4 Hz (2), 4.2 Hz (3)   |
| <i>R</i> -VAPOL-PA        | 39.34 Hz (1), 20.04 Hz (3), 34.80 Hz (3'), 152.82 Hz (2), 71.47 Hz (2') | 15.71 Hz (1), 44.8 Hz (2), 3.6 Hz (3) |

(Note: The chemical shift difference taken from the reference *Anal. Chem.* **2013**, 85, 10887–10894)

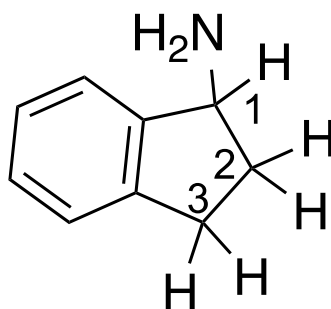

Table S2: Comparison of  $^1\text{H}$  and  $^{13}\text{C}$  NMR Chemical shift values in the pure and complex state.

| CSA                     | Analyte: $\alpha$ -methylbenzylamine(1) |                                      | Analyte: Mandelic acid(6)   |                |
|-------------------------|-----------------------------------------|--------------------------------------|-----------------------------|----------------|
|                         | $\delta$ $^1\text{H}$ (ppm)             | $\Delta$ (ppm)                       | $\delta$ $^1\text{H}$ (ppm) | $\Delta$ (ppm) |
| Pure                    | 0.79 (CH <sub>3</sub> ),<br>3.23 (CH)   | 0.62 (CH <sub>3</sub> ),<br>0.9 (CH) | 5.26 (CH)                   | 0.19(CH)       |
| <i>R</i> -VAPOL-PA:DMAP | 1.41 (CH <sub>3</sub> ),<br>4.13 (CH)   |                                      | 5.07 (CH)                   |                |

Figure S1:  $^1\text{H}$ -NMR spectrum of racemic 1-aminoindane in  $\text{CDCl}_3$  with 1 equivalent of *R*-VAPOL PA added.

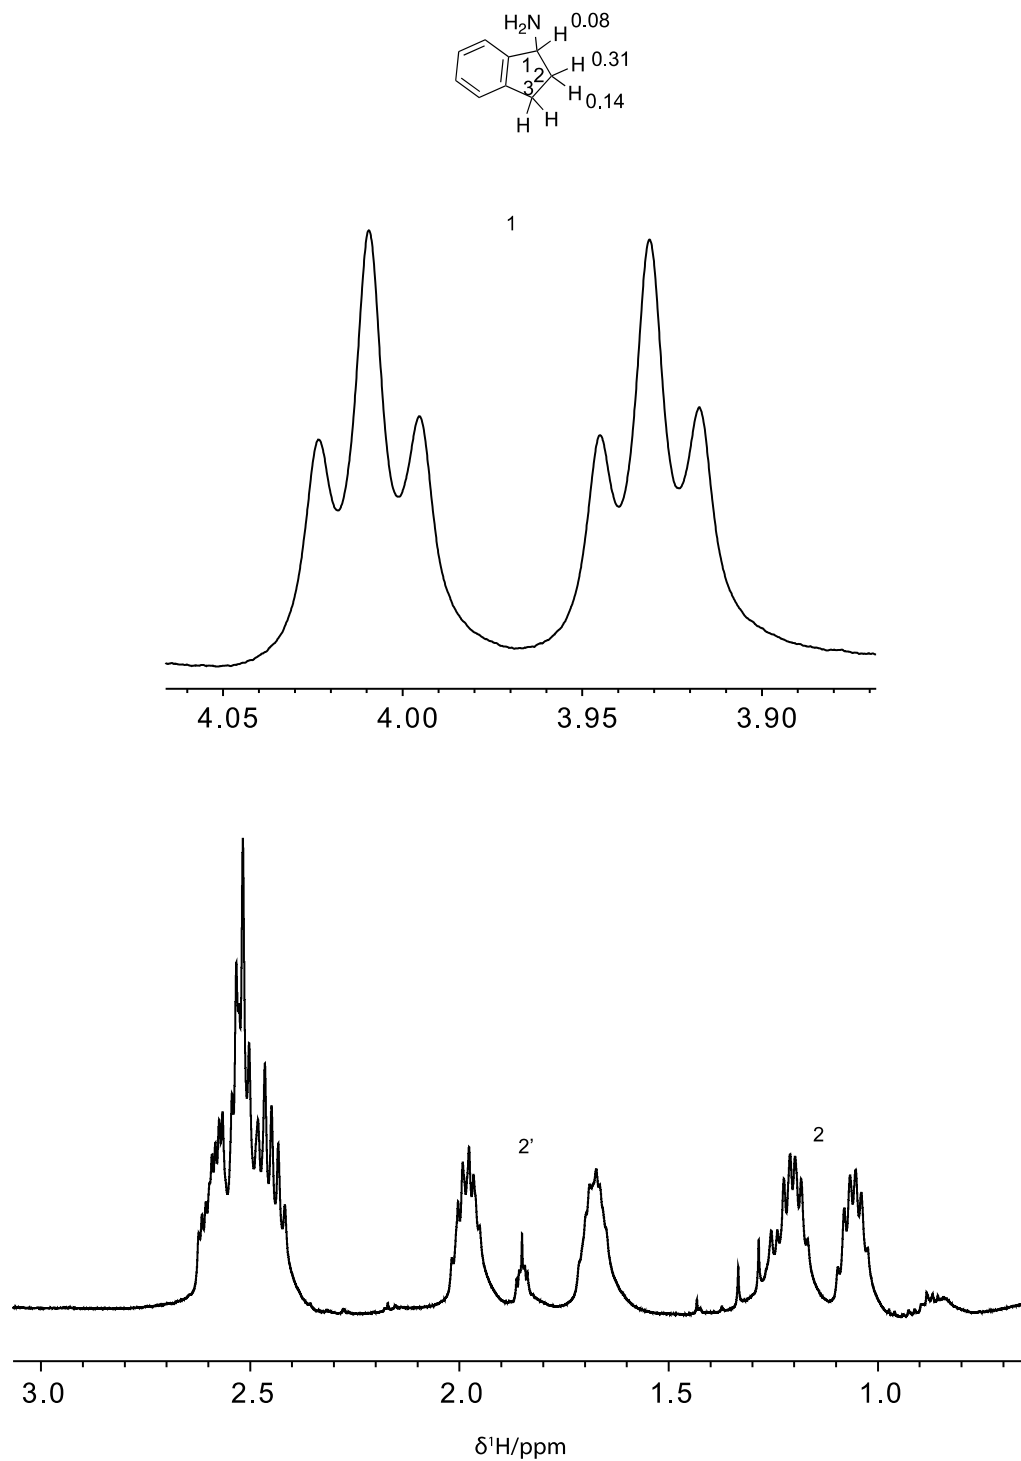

Figure S2: The ternary ion pair formation mechanism.

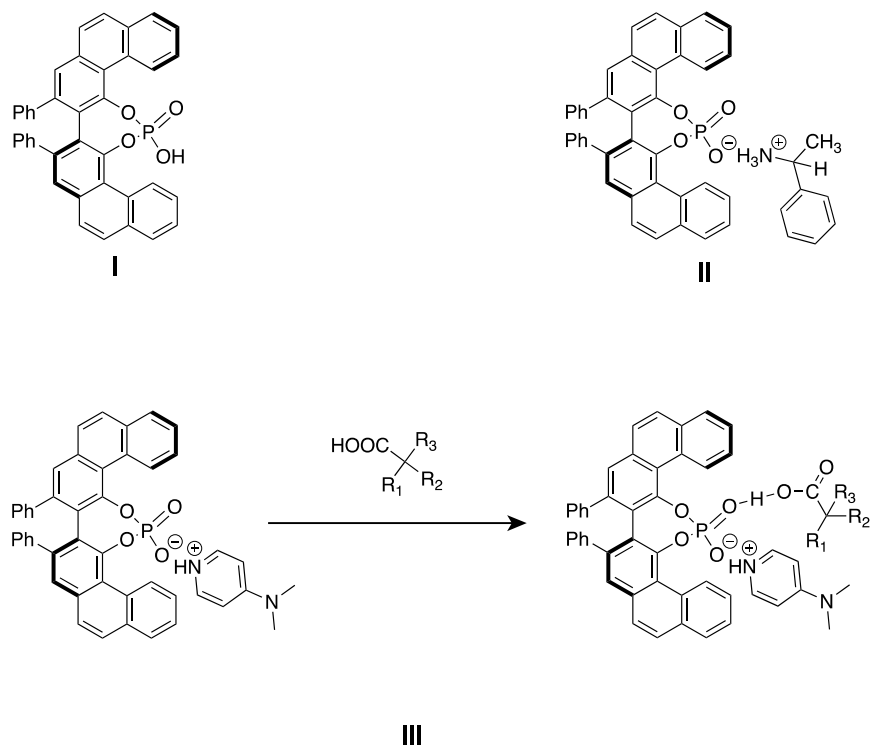

Figure S3:  $^1\text{H}$  and  $^{13}\text{C}\{^1\text{H}\}$  NMR spectra of racemic alphamethylbenzylamine(1) in  $\text{CDCl}_3$  with 1 equivalent of *R*-VAPOL PA added.

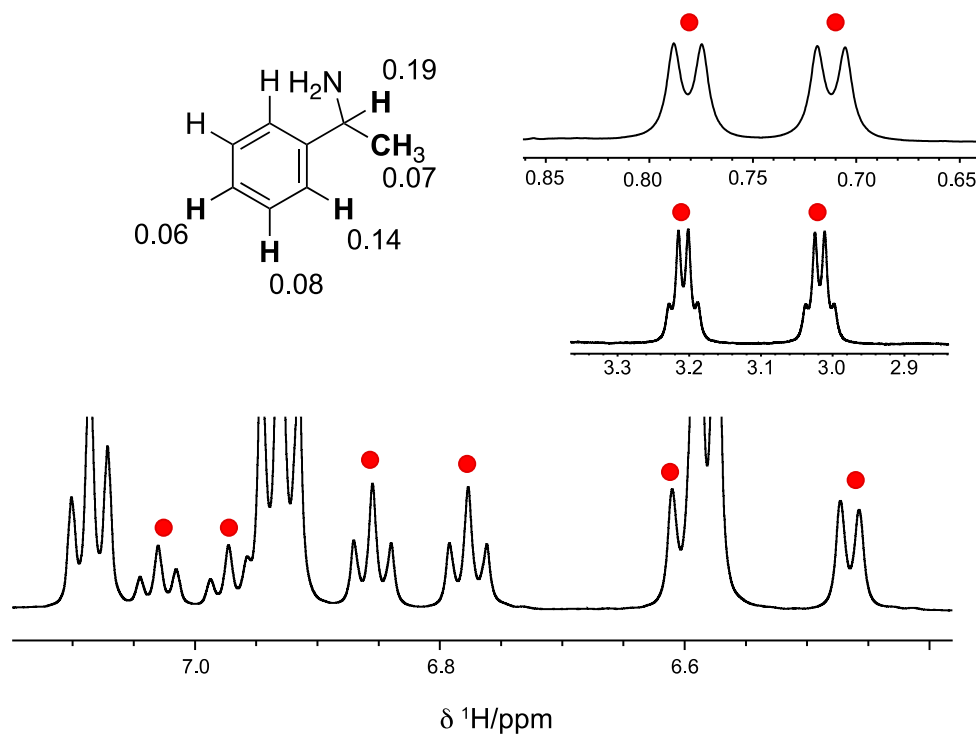

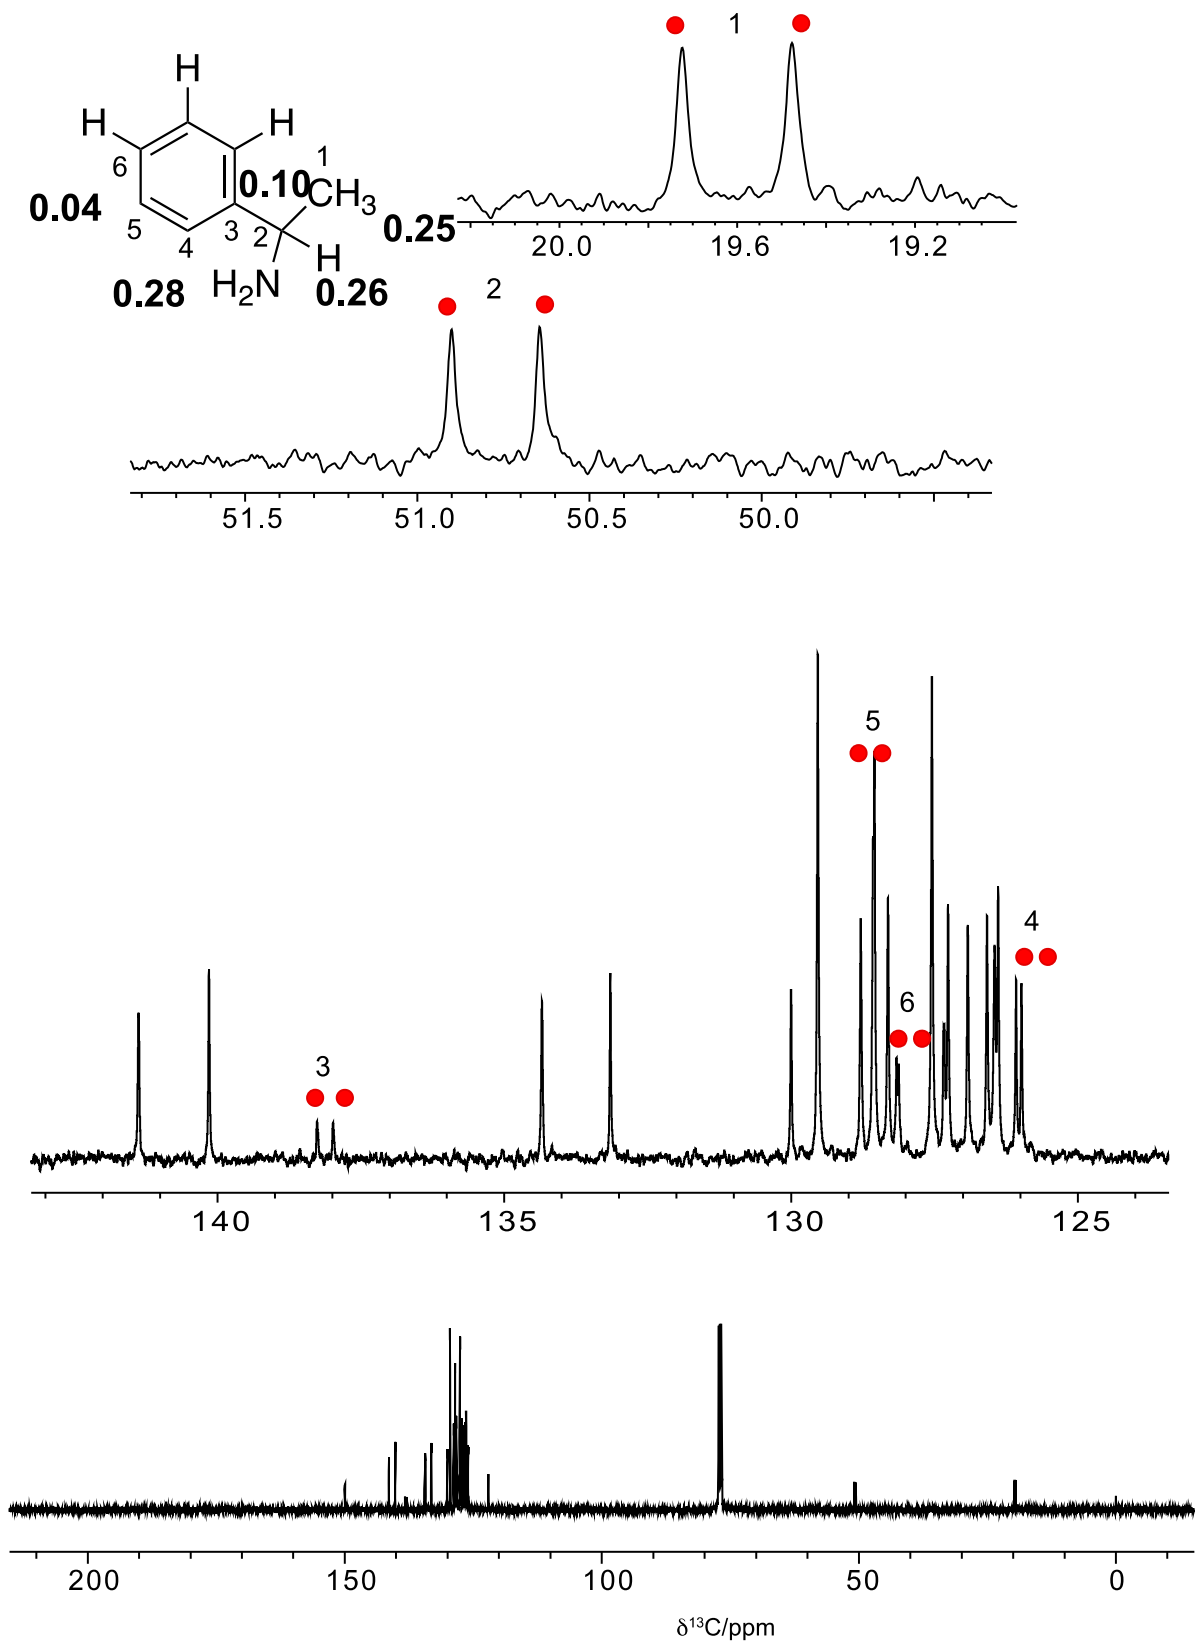



Figure S4:  $^1\text{H}$  and  $^{13}\text{C}\{^1\text{H}\}$  NMR spectra of racemic 2-amino-1-butanol (1 equivalent) in  $\text{CDCl}_3$  with 1 equivalent of R-VAPOL PA added.

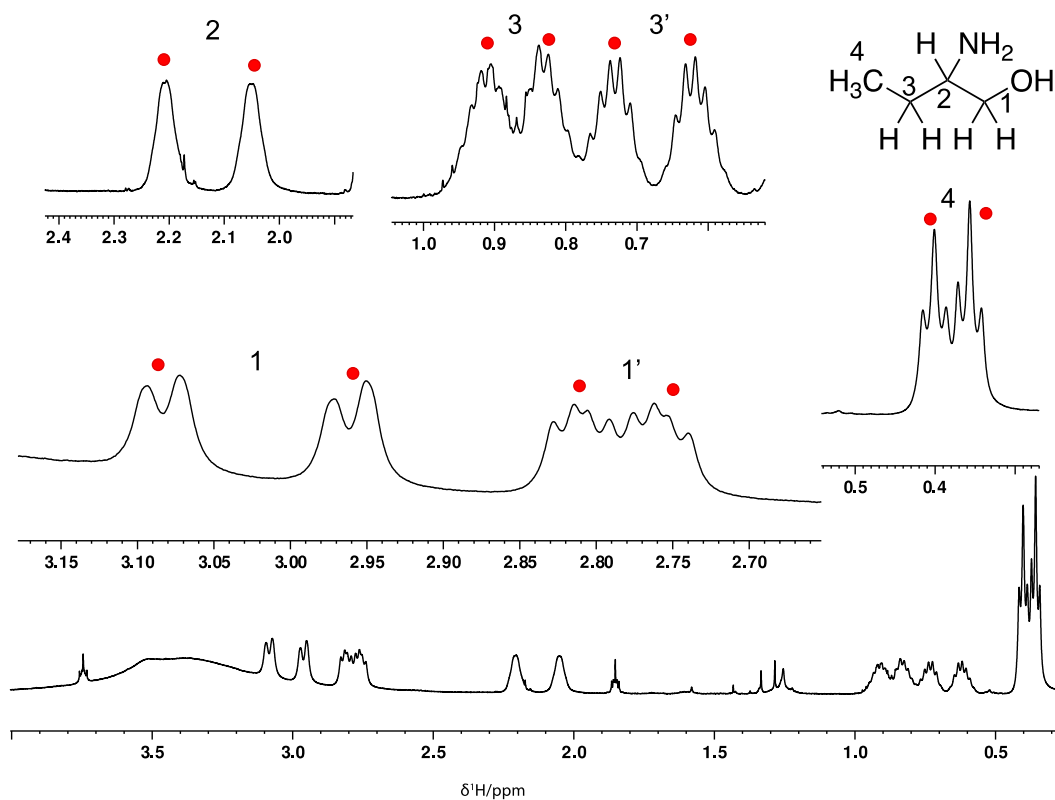

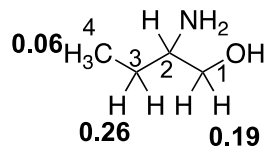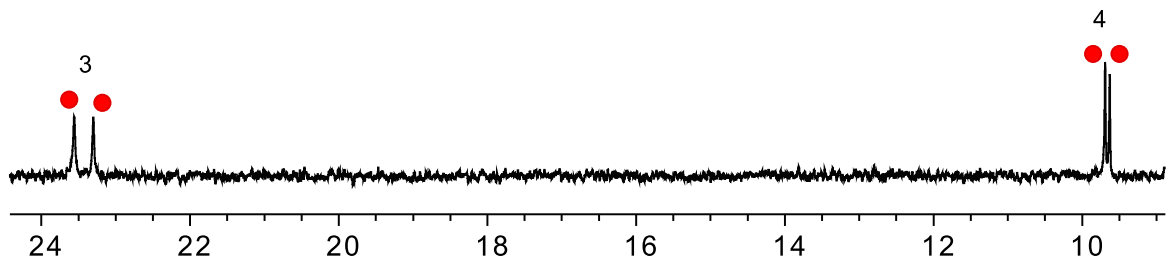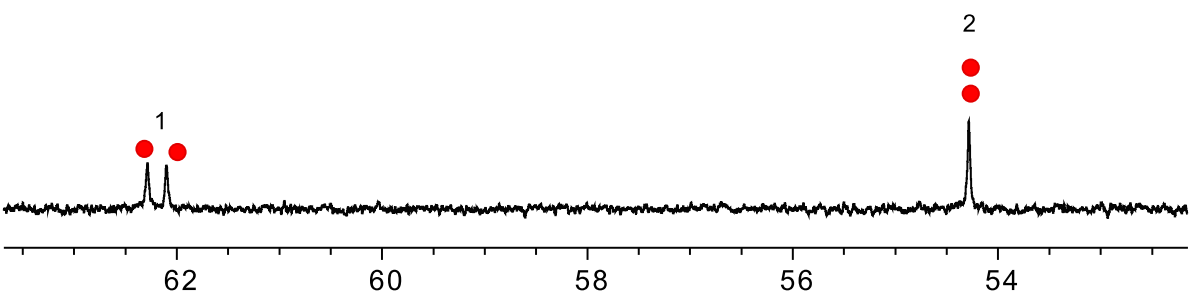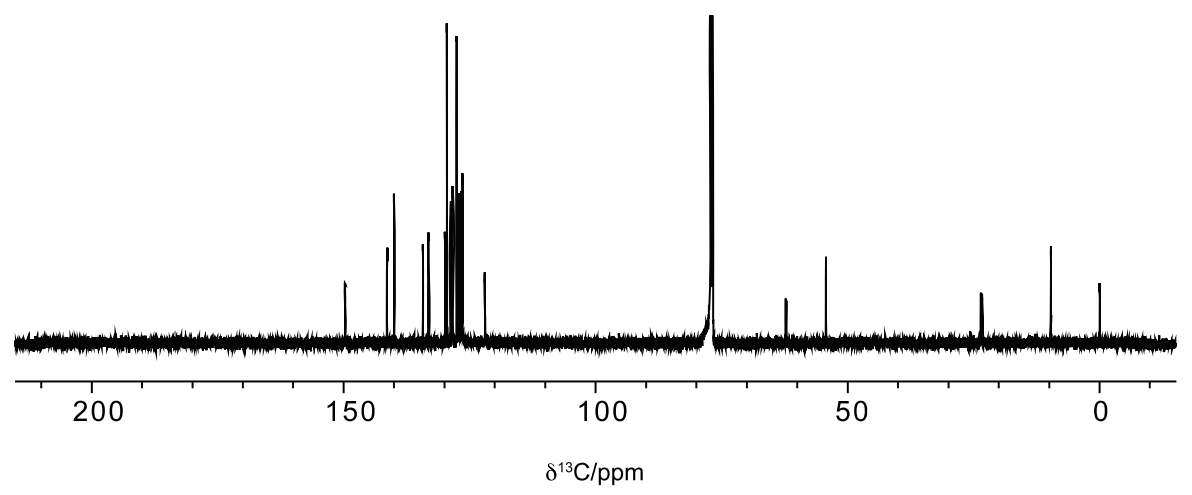

Figure S5:  $^1\text{H}$  and  $^{13}\text{C}\{^1\text{H}\}$  NMR spectra of racemic 2-butylamine (1 equivalent) in  $\text{CDCl}_3$  with 1 equivalent of R-VAPOL PA added.

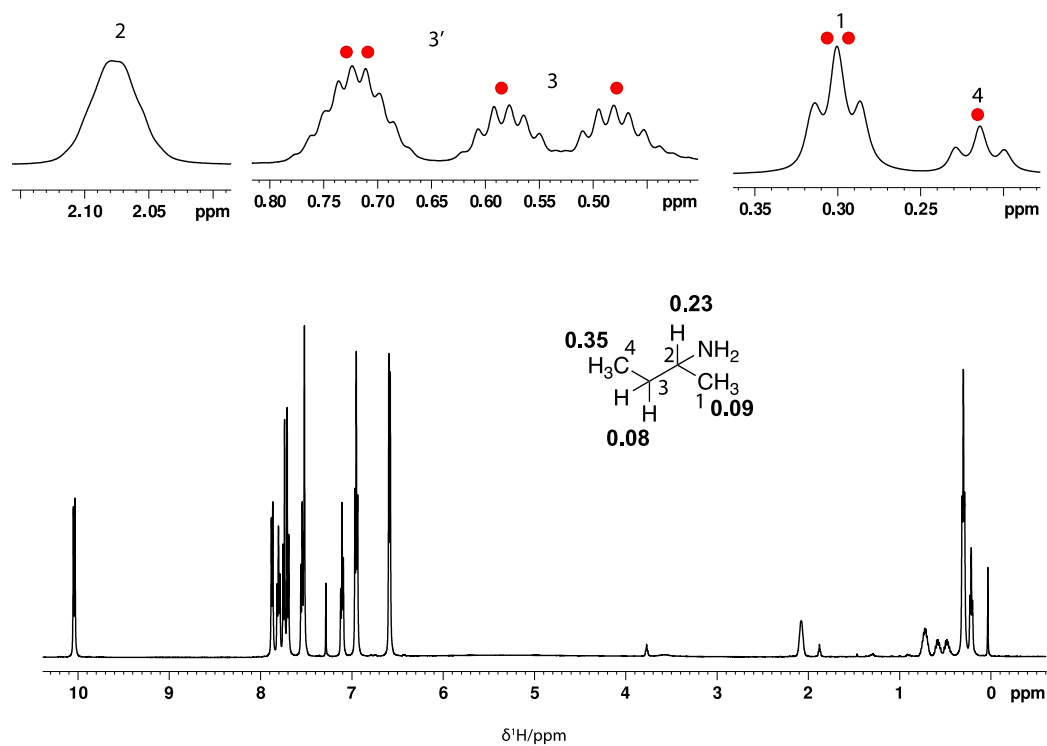

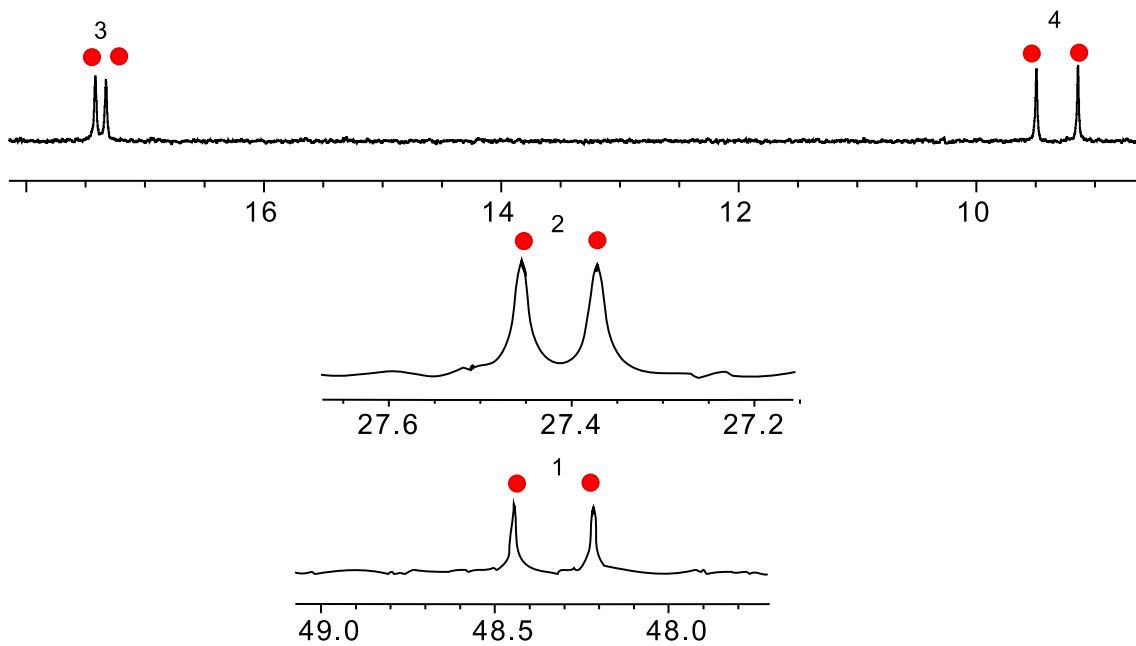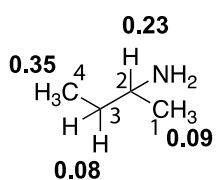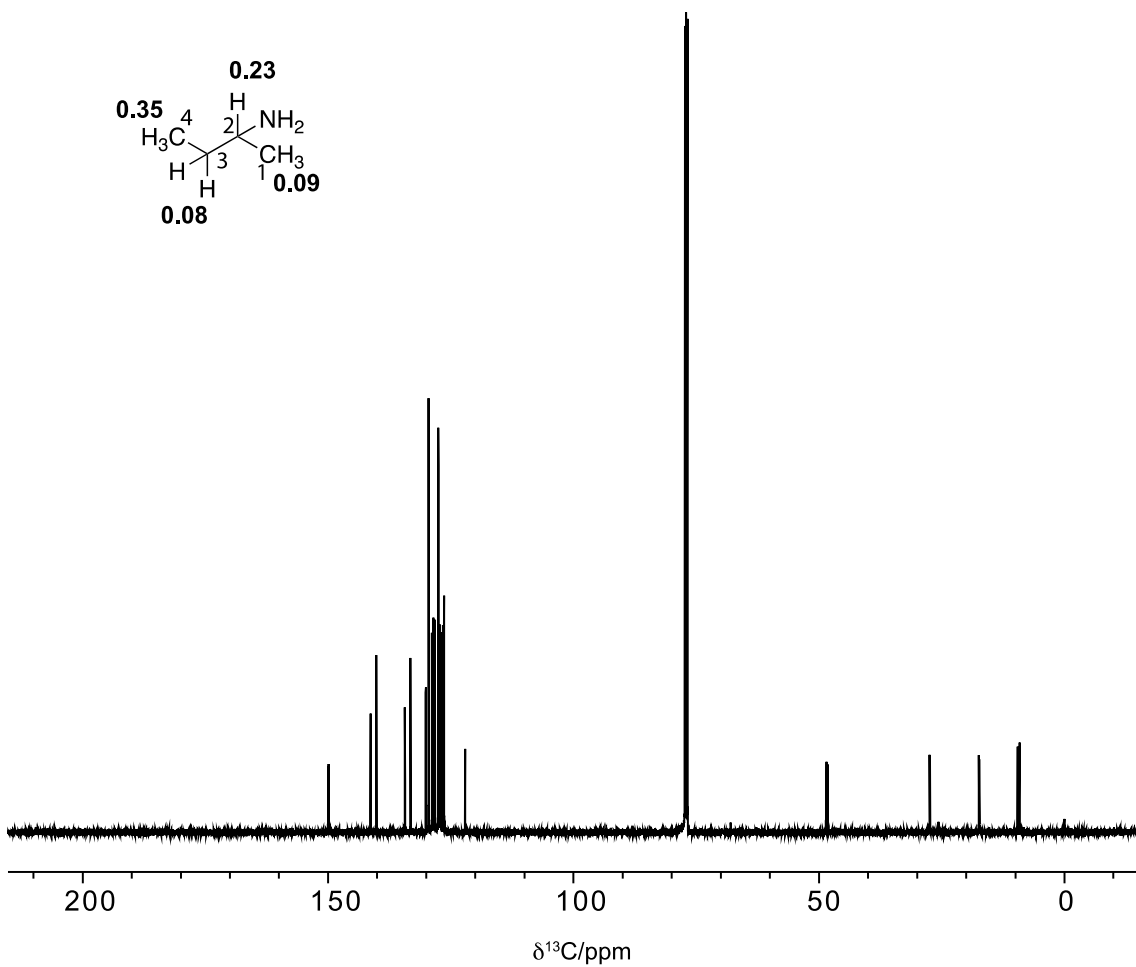

Figure S6:  $^1\text{H}$  and  $^{13}\text{C}\{^1\text{H}\}$  NMR spectra of racemic 1-aminoindane (1 equivalent) in  $\text{CDCl}_3$  with 1 equivalent of R-VAPOL PA added.

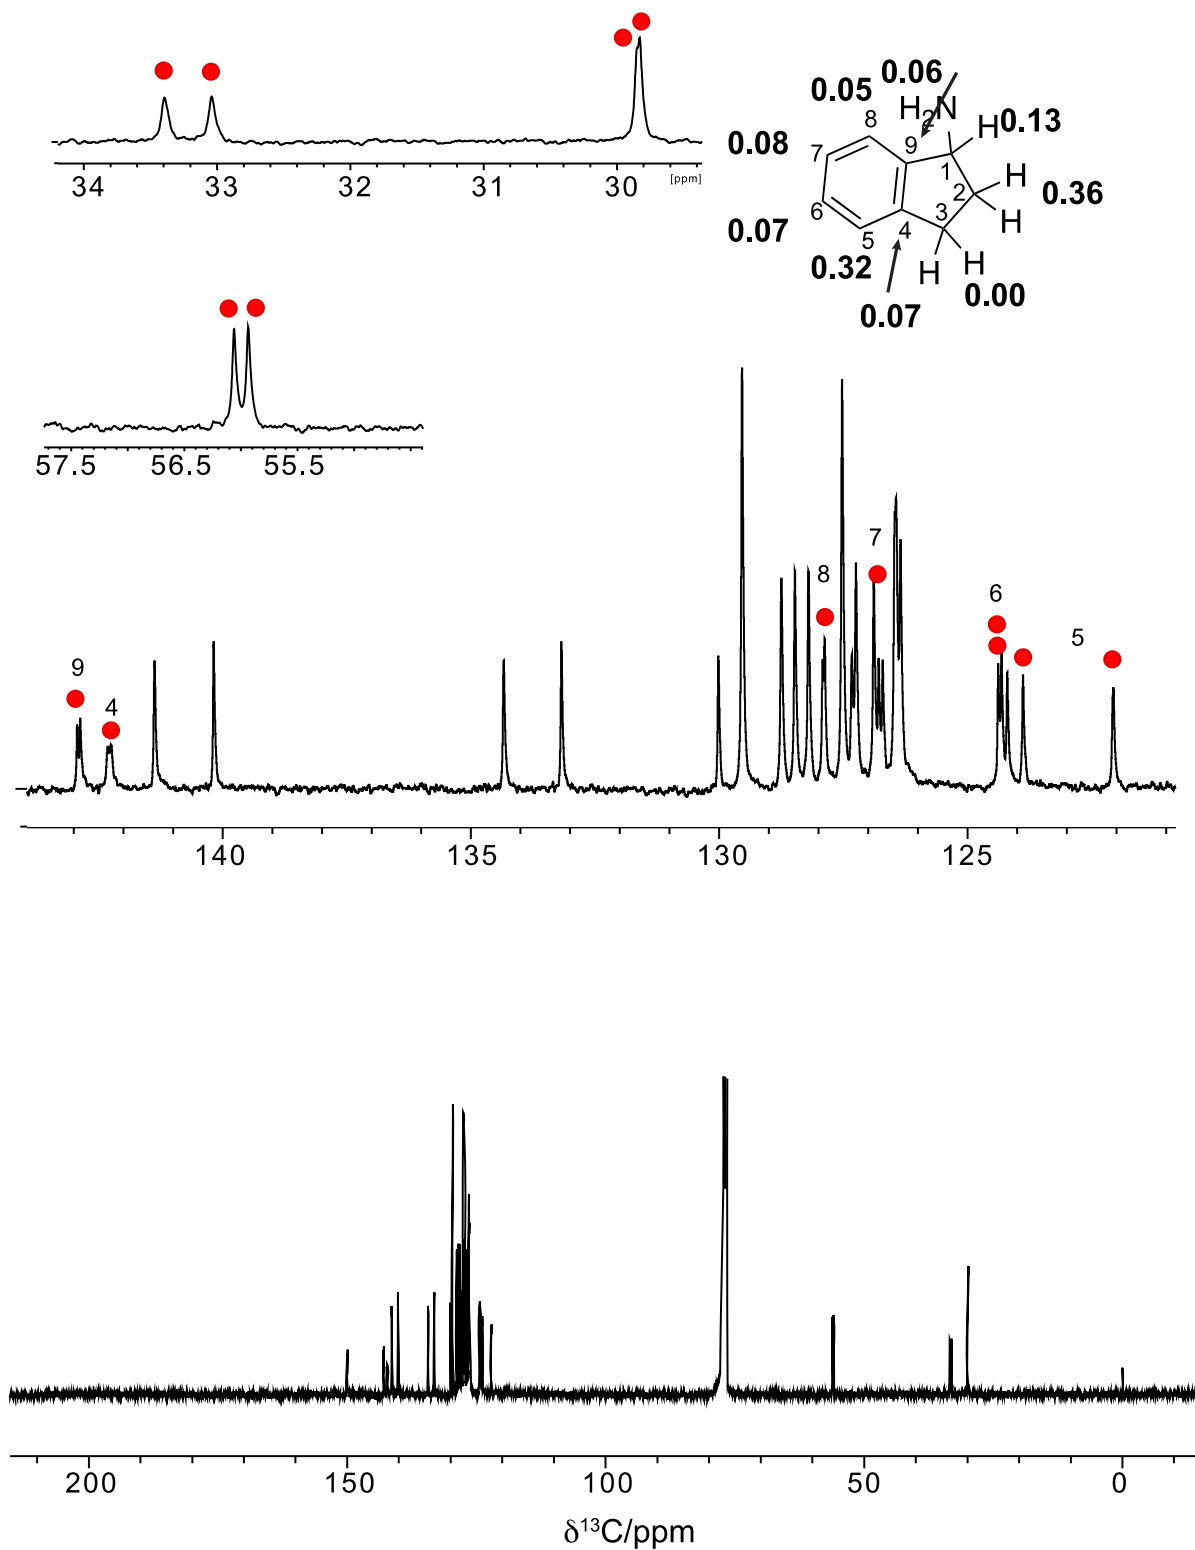

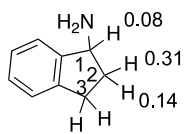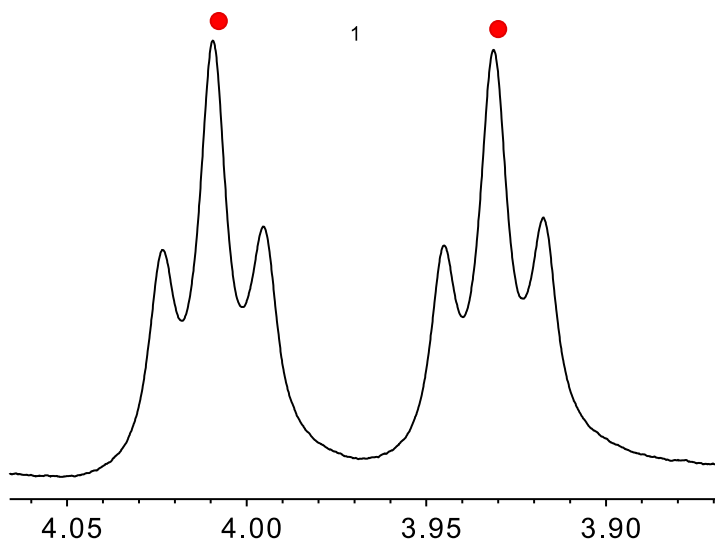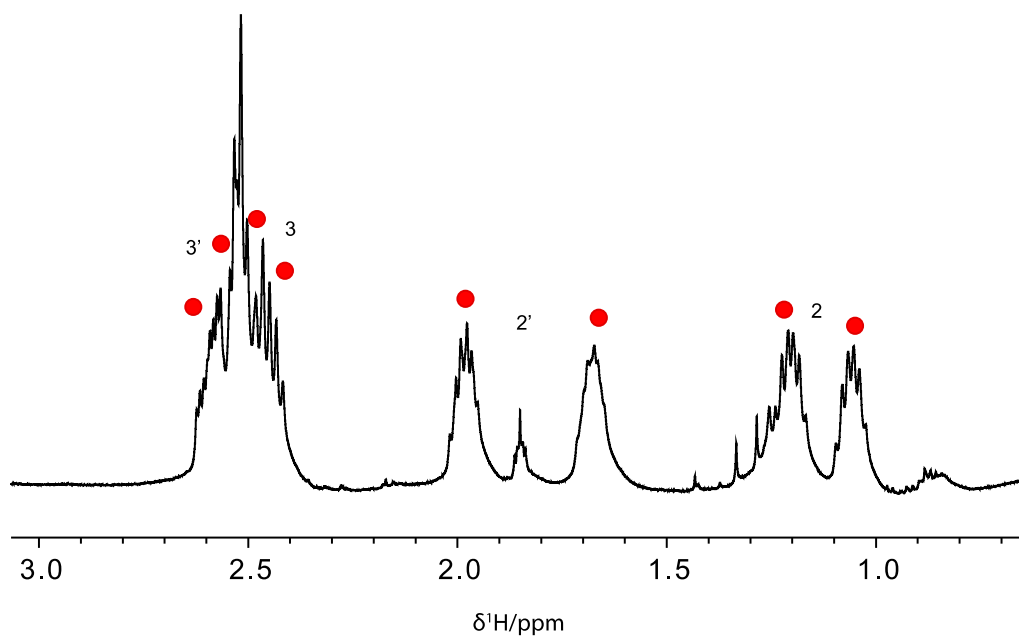

Figure S7:  $^1\text{H}$  and  $^{13}\text{C}\{^1\text{H}\}$  NMR spectra of racemic 2-methylpiperidine (1 equivalent) in  $\text{CDCl}_3$  with 1 equivalent of R-VAPOL PA added.

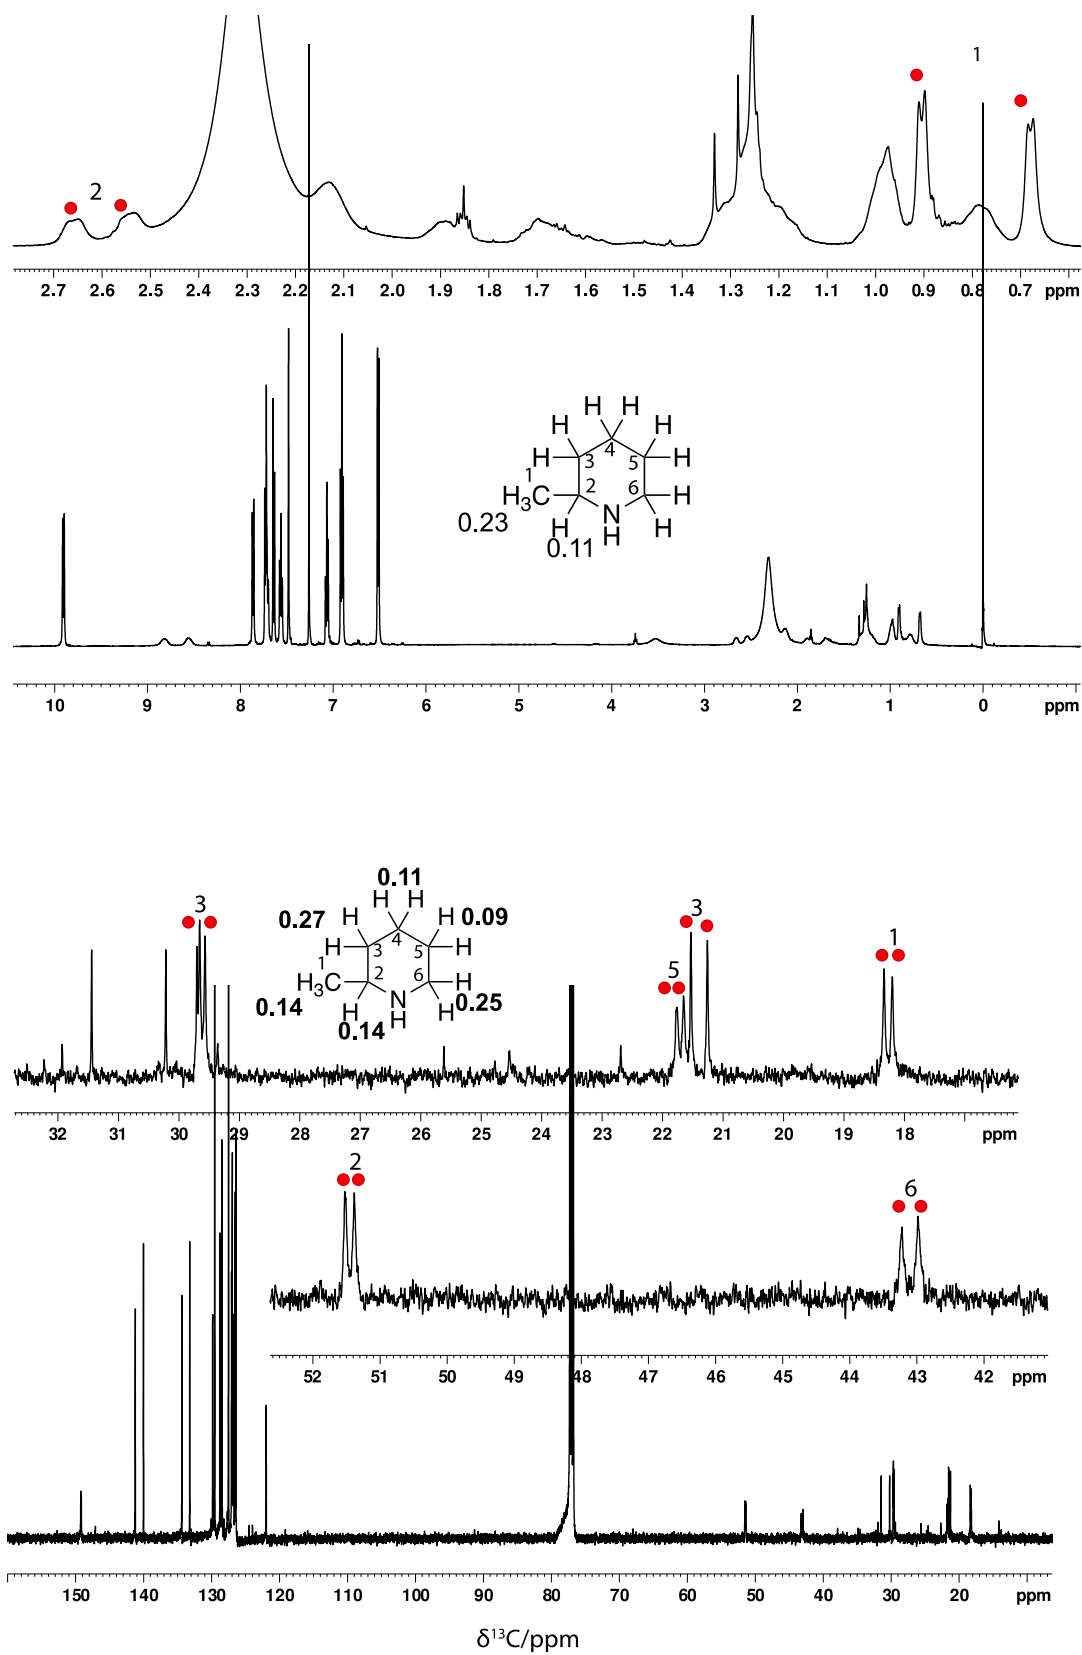

Figure S8:  $^1\text{H}$  and  $^{13}\text{C}\{^1\text{H}\}$  NMR spectra of racemic mandelic acid in  $\text{CDCl}_3$  with 1 equivalent of *R*-VAPOL PA and DMAP added.

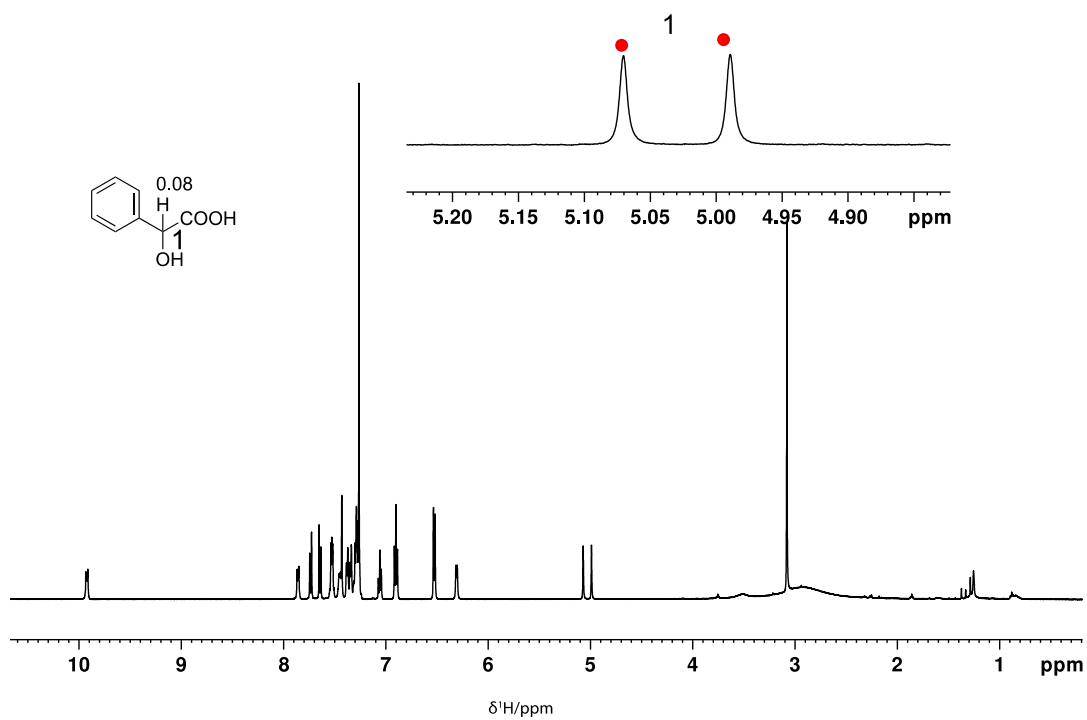



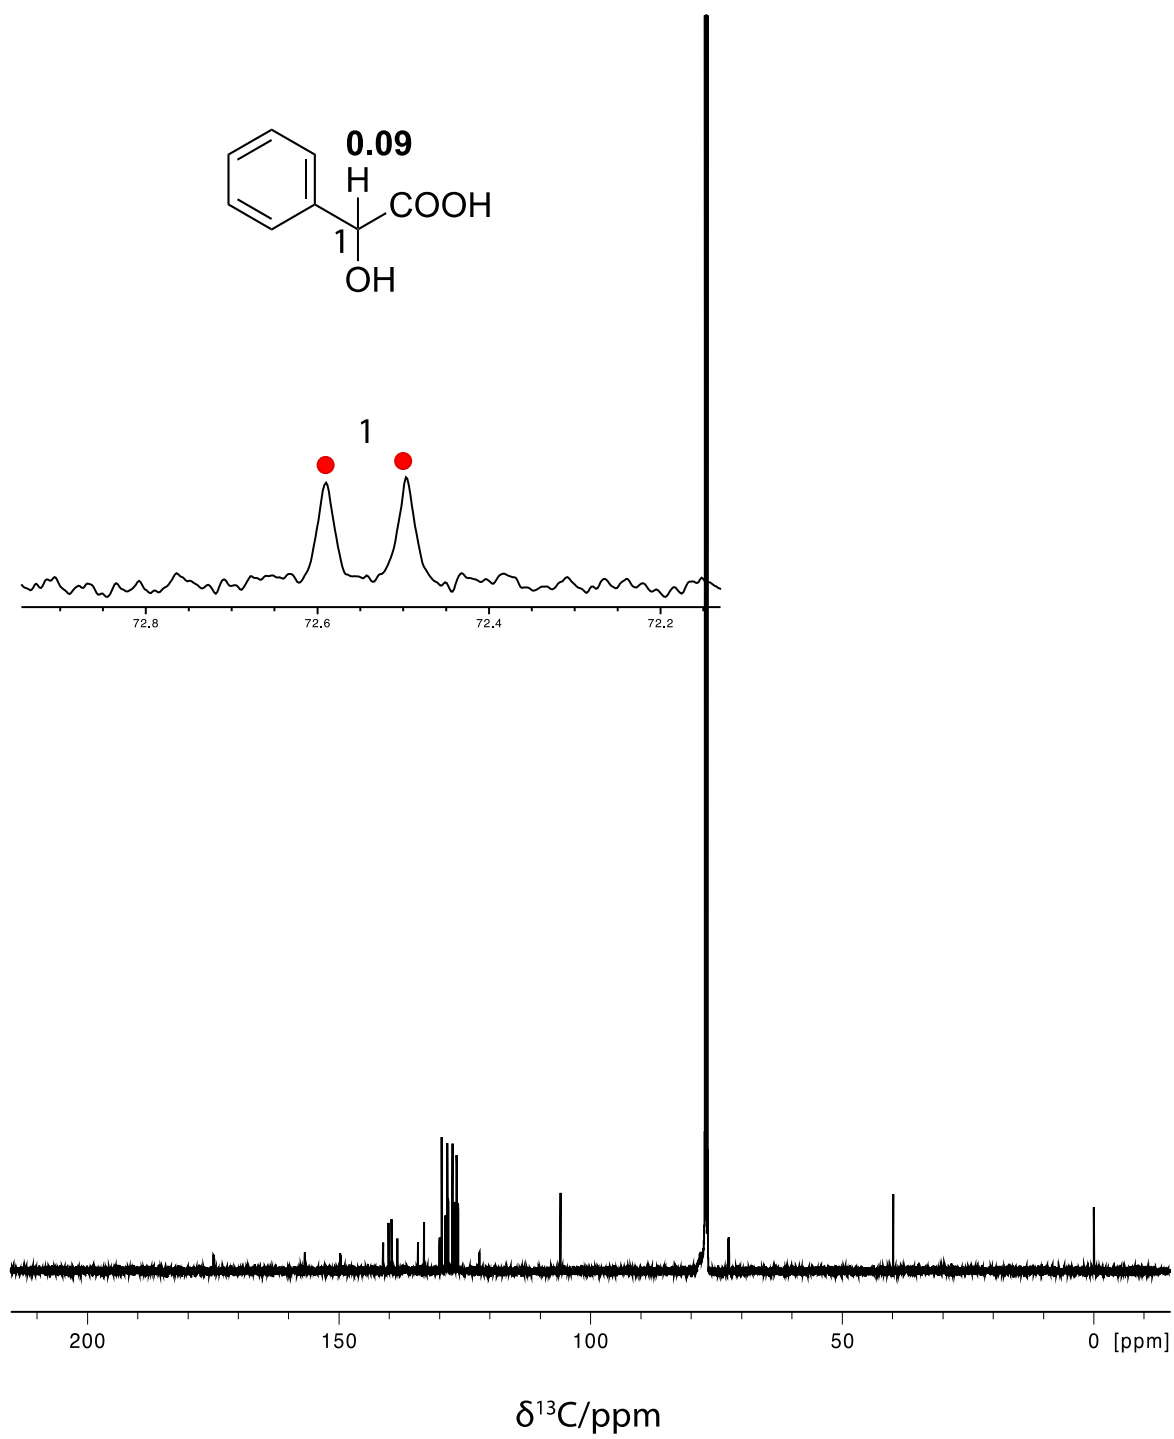

Figure S9:  $^1\text{H}$  and  $^{13}\text{C}\{^1\text{H}\}$  NMR spectra of racemic 2-chloro-mandelic acid (1 equivalent) in  $\text{CDCl}_3$  with 1 equivalent of *R*-VAPOL PA and DMAP added.

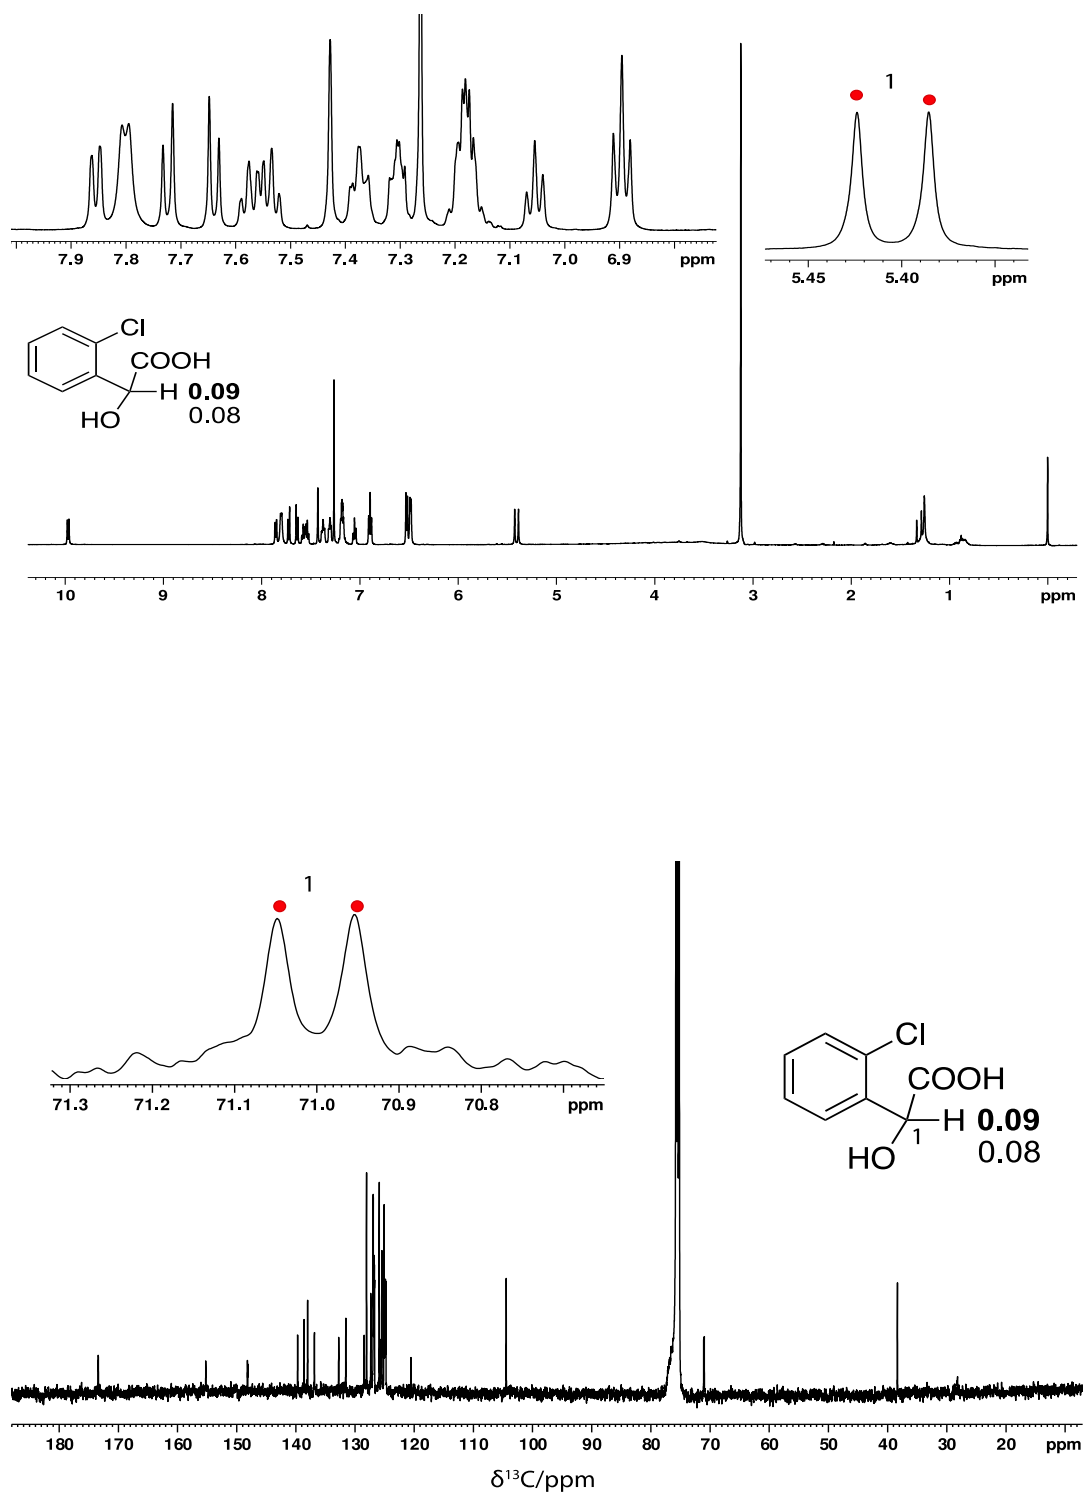

Figure S10:  $^1\text{H}$  spectrum of racemic 2-chloropropanoic acidI(8)(1 equivalent) in  $\text{CDCl}_3$  with 2 equivalent of *R*-VAPOL PA and DMAP added.

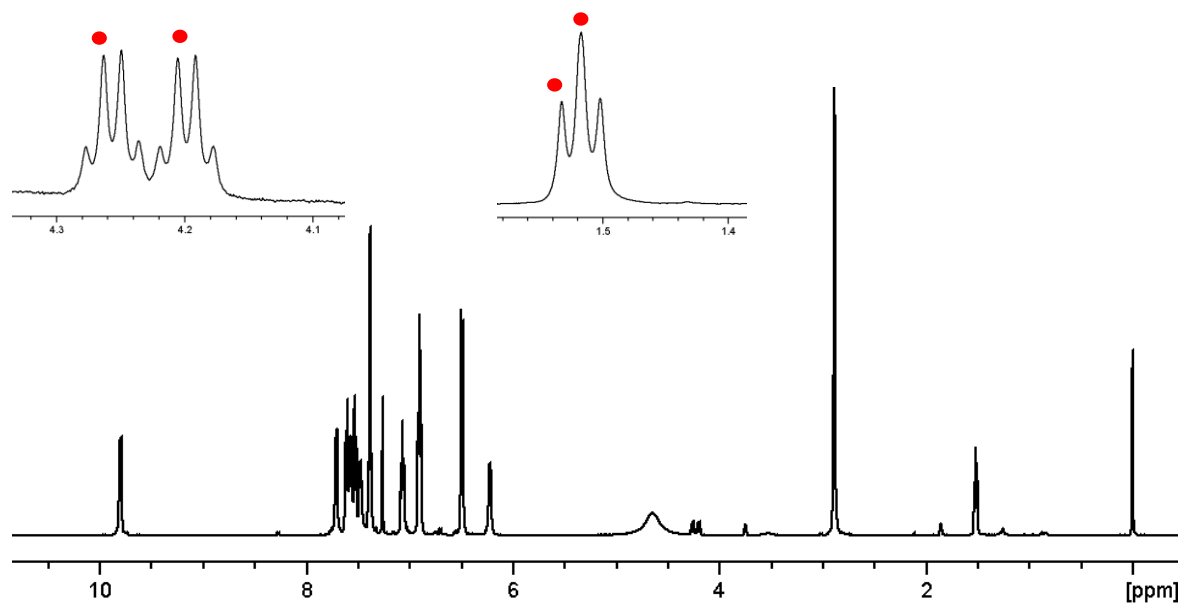

Figure S11:  $^1\text{H}$  spectrum of racemic Ibuprofen (9) (1equivalent) in  $\text{CDCl}_3$  with 2 equivalent of *R*-VAPOL PA and DMAP added.

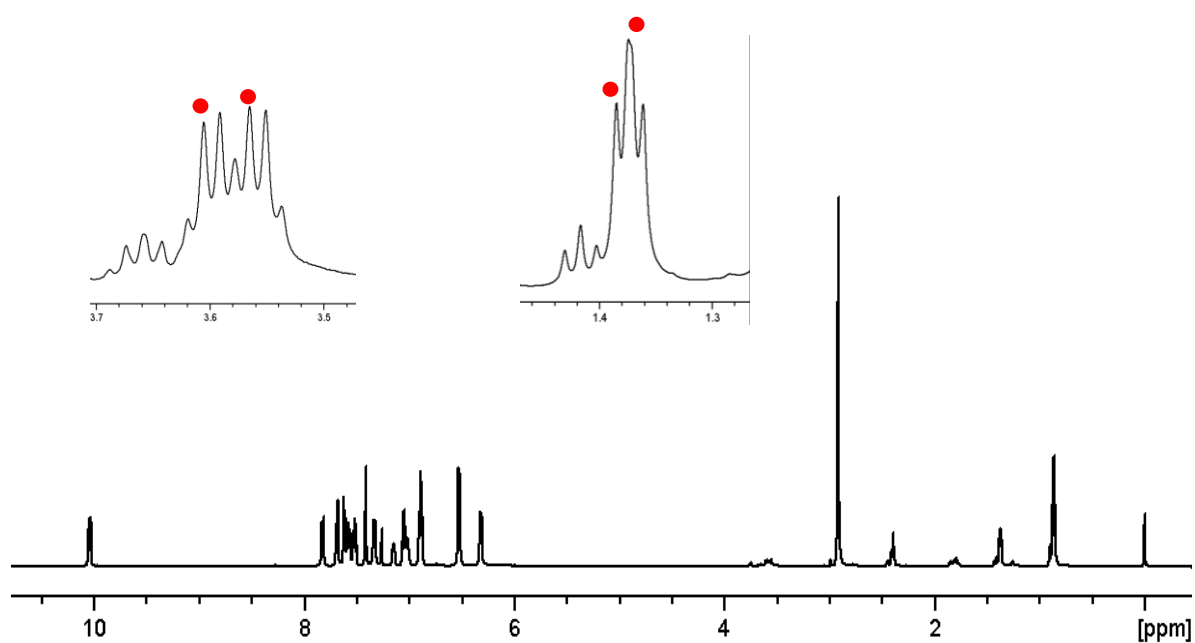

Figure S12:  $^1\text{H}$  and  $^{13}\text{C}\{^1\text{H}\}$  NMR spectra of racemic 1-aminoindane(4) (1 equivalent) in  $\text{CDCl}_3$  with 1 equivalent of R-BINOL added.

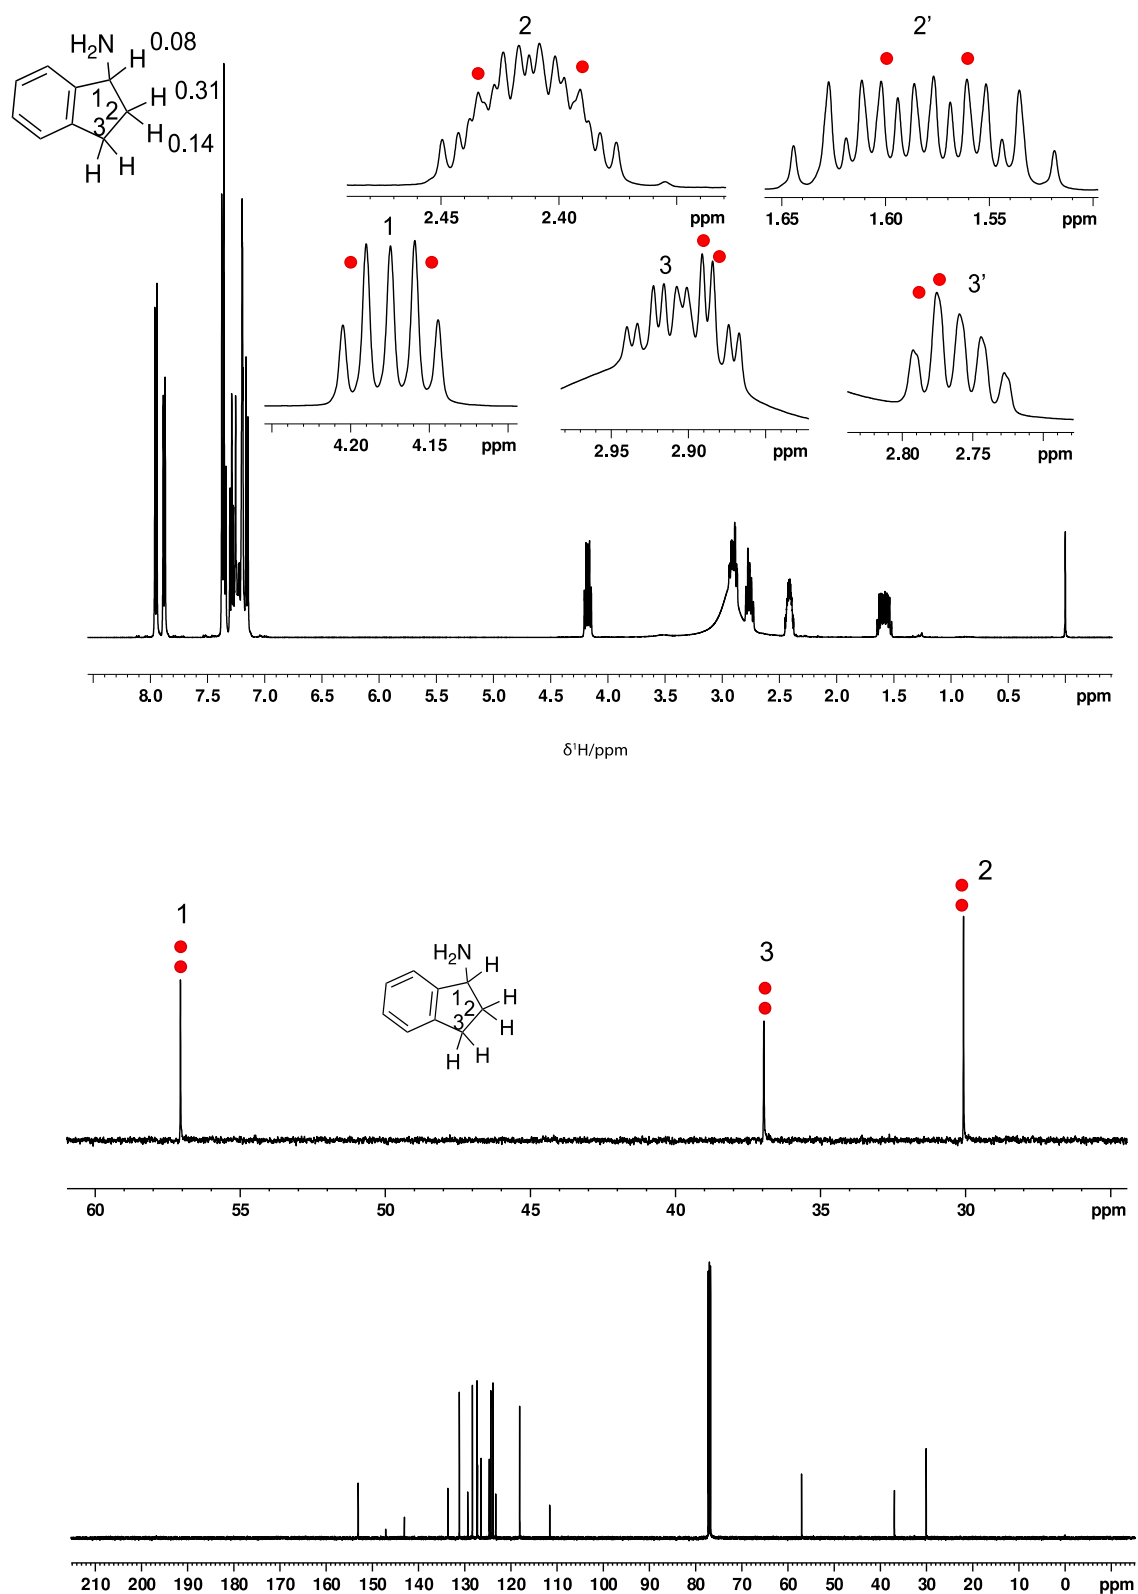

Figure S13: 2D  $^1\text{H}$  J-resolved spectrum NMR spectra of racemic 9 (1 equivalent) in  $\text{CDCl}_3$  with 2 equivalent of *R*-VAPOL PA and DMAP added.

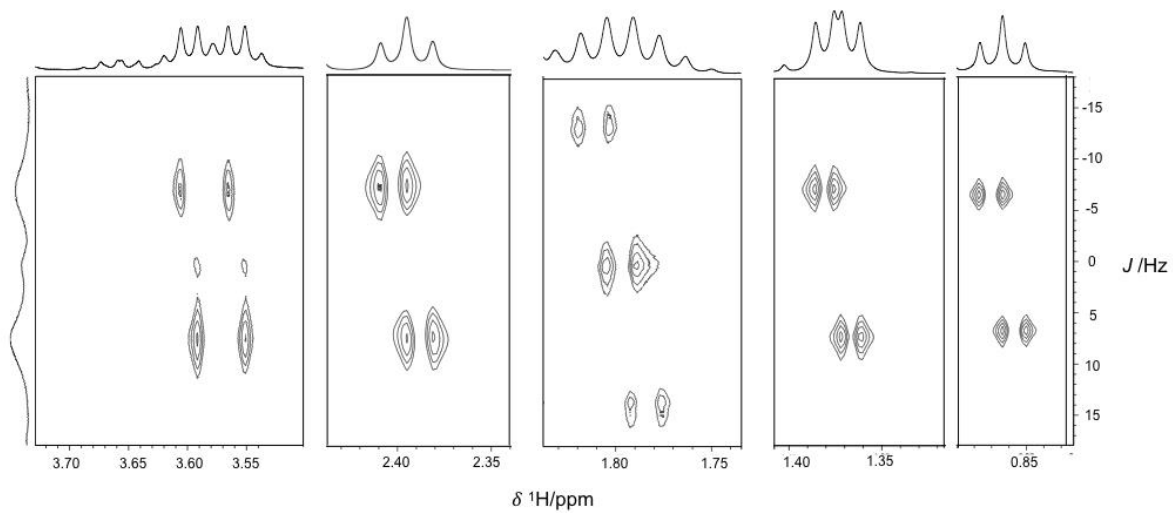

Figure S14:  $^1\text{H}$  spectrum of racemic 2-Hydroxy 3-methyl butyric acid (10) (1 equivalent) in  $\text{CDCl}_3$  with 2 equivalent of *R*-VAPOL PA and DMAP added.

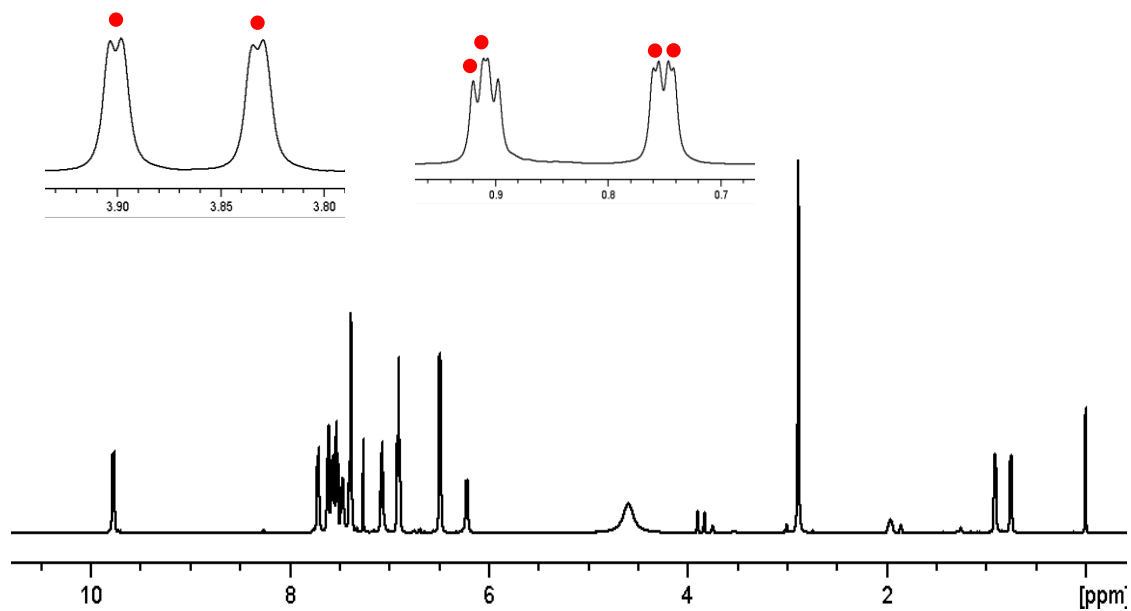

Figure S15:  $^1\text{H}$  spectrum of racemic lactic acid (11) (1 equivalent) in  $\text{CDCl}_3$  with 1 equivalent of *R*-VAPOL PA and DMAP added.

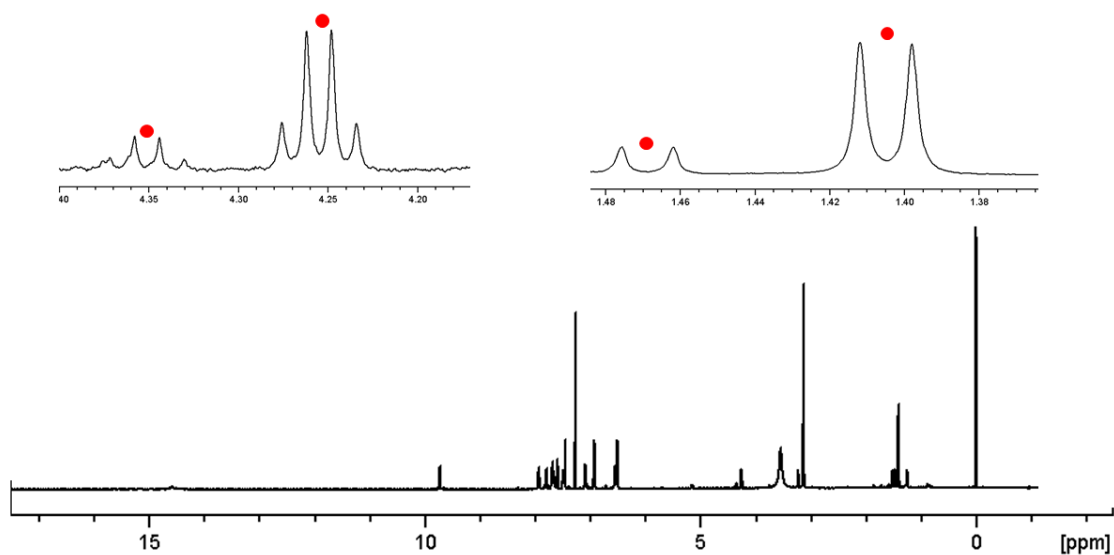

Figure S16:  $^1\text{H}$  spectrum of racemic Phenylacetic acid (12) (1equivalent) in  $\text{CDCl}_3$  with 2 equivalent of *R*-VAPOL PA and DMAP added.

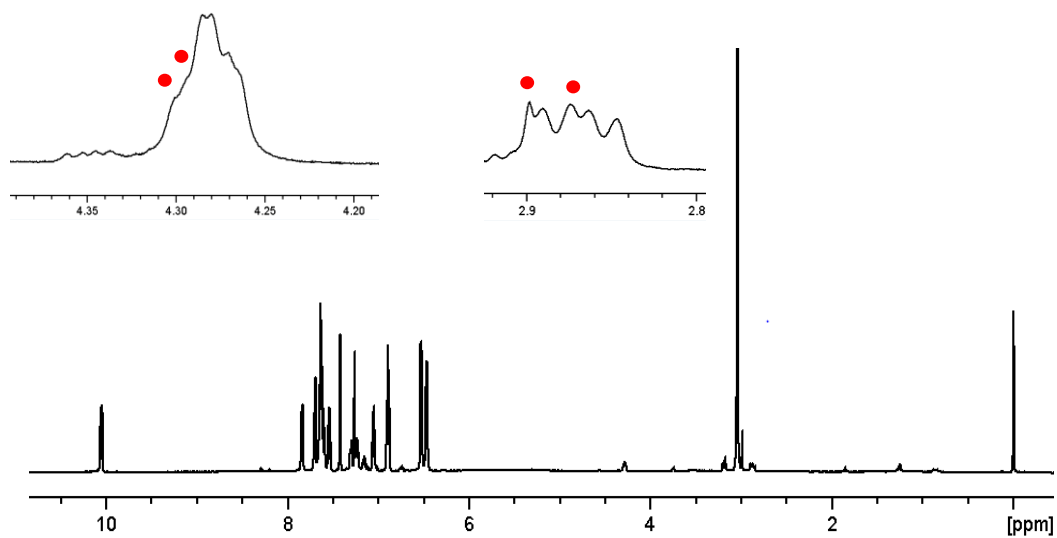

Figure S17:  $^1\text{H}$  spectrum of racemic Bromosuccinic acid (13) (1equivalent) in  $\text{CDCl}_3$  with 2 equivalent of *R*-VAPOL PA and DMAP added.

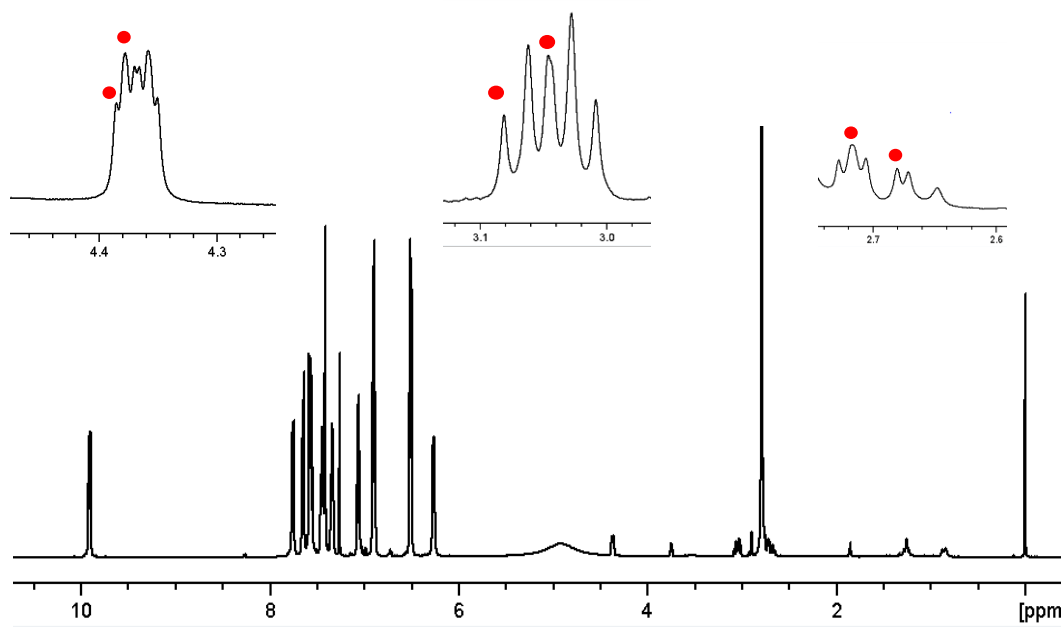

Table S3: The experimentally Determined and laboratory prepared scalemic ratio of (R)-(+)- $\alpha$ -Methylbenzylamine and (S)-(-)- $\alpha$ -Methylbenzylamine. The C(H)NH<sub>2</sub> peak was chosen to measure ee

| <i>(R)</i> Enantiomer |                         |                | <i>(S)</i> Enantiomer |                         |                |
|-----------------------|-------------------------|----------------|-----------------------|-------------------------|----------------|
| Gravimetric (ee)      | Experimental (NMR) (ee) | Integral (abs) | Gravimetric           | Experimental (NMR) (ee) | Integral (abs) |
| 50.00                 | 50.074                  | 1339481586     | 50.00                 | 49.93                   | 1335540873     |
| 70.00                 | 69.110                  | 5834674654     | 30.00                 | 30.89                   | 2607902814     |
| 75.00                 | 74.930                  | 3757999390     | 25.00                 | 25.07                   | 1257315684     |
| 87.00                 | 88.680                  | 5621687032     | 13.00                 | 11.32                   | 717636699      |
| 95.00                 | 94.827                  | 8656606700     | 5.00                  | 5.17                    | 472201958      |

Figure S18: DFT optimized geometries of the molecule with I (right side) and 1 (left side). [see Figure 2 and 3 in the main paper for structural details]

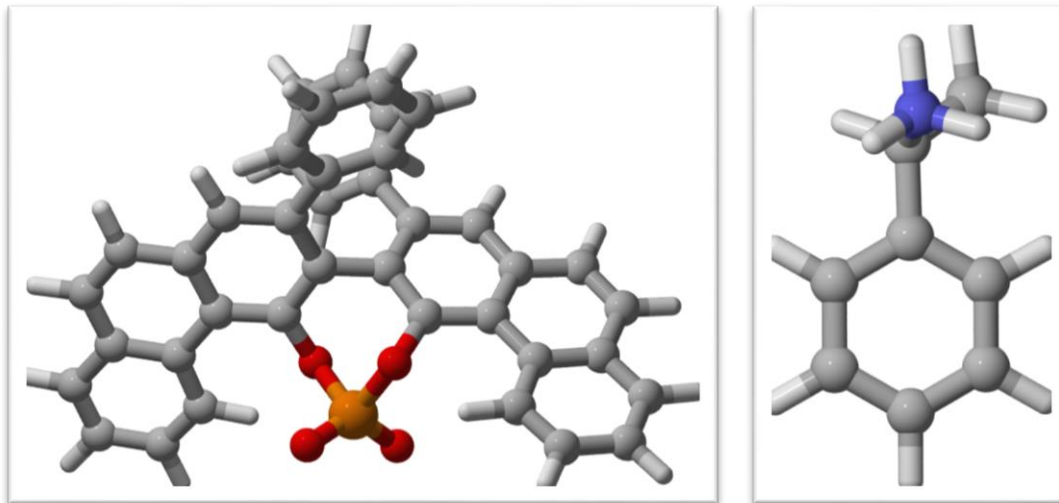



Figure S19: DFT optimized geometries of the R-1-I and S-1-I complexed structures.

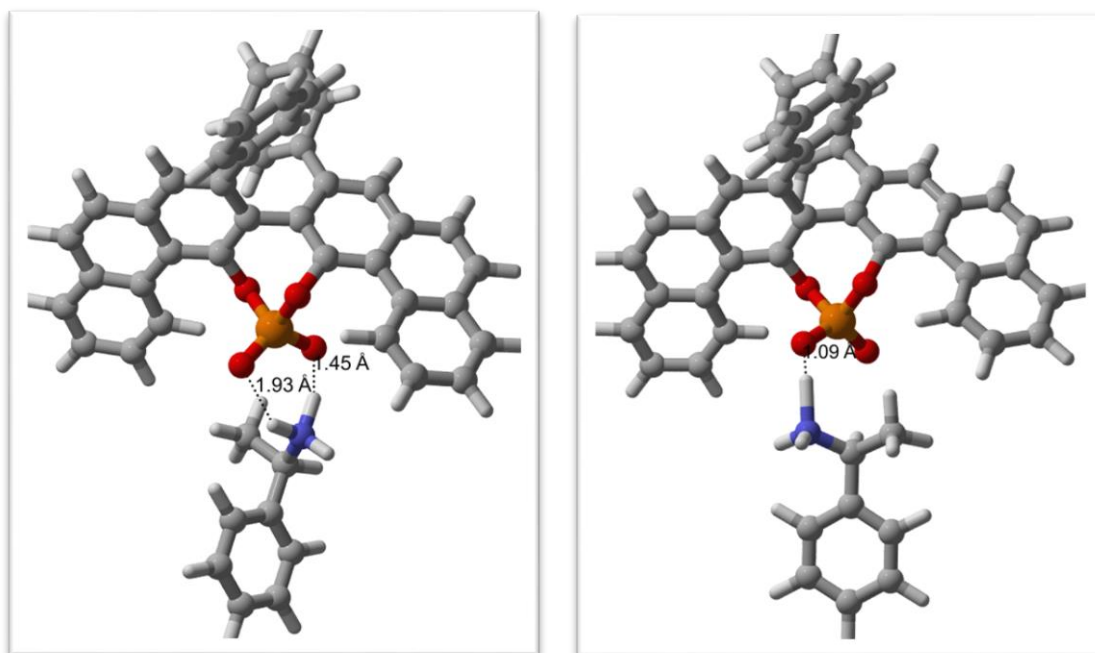

Figure S20: DFT optimized geometries of the molecule with I and 6. [see Figure 2 and 3 in the main paper for structural details]

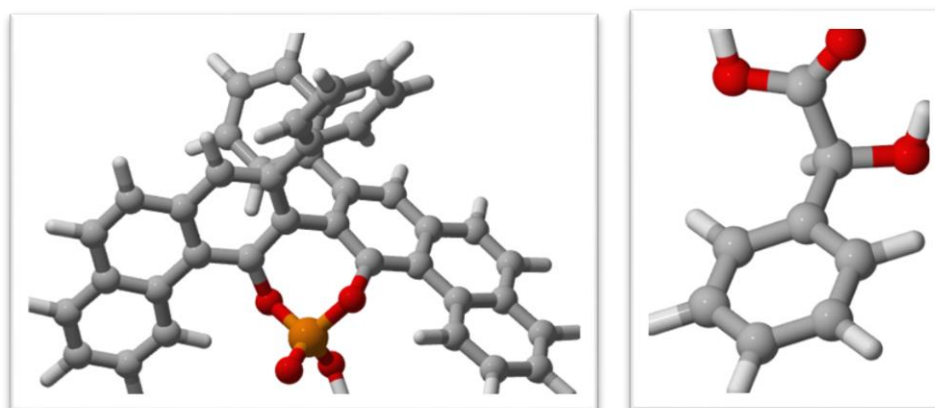

Figure S21: DFT optimized geometries of the R-6-I and S-6-I structures.

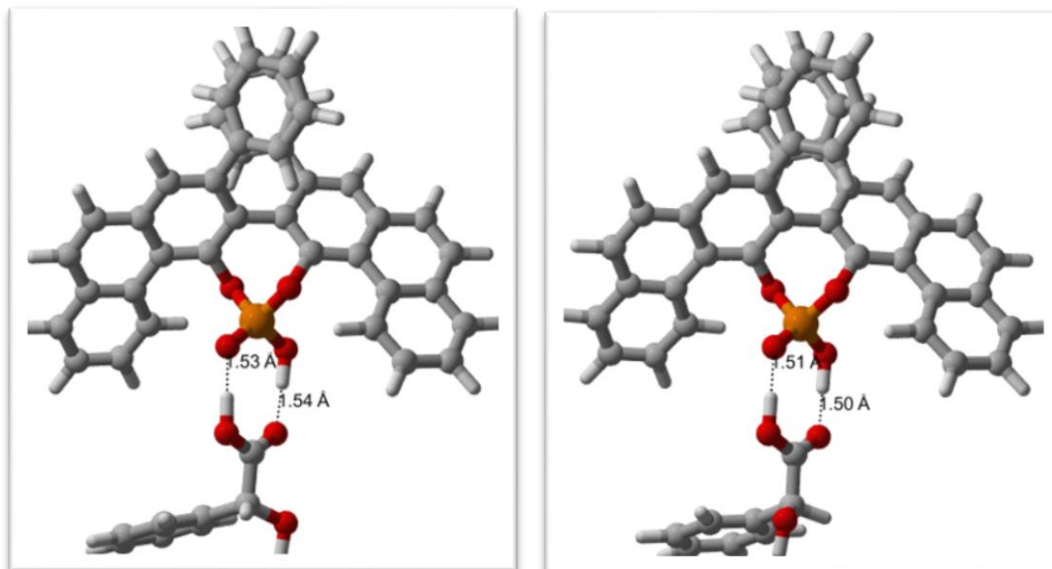

Figure S22: DFT optimized geometries of the molecule with I, 6 and DMAP. [see Figures 2 and 3 in the main paper for structural details]

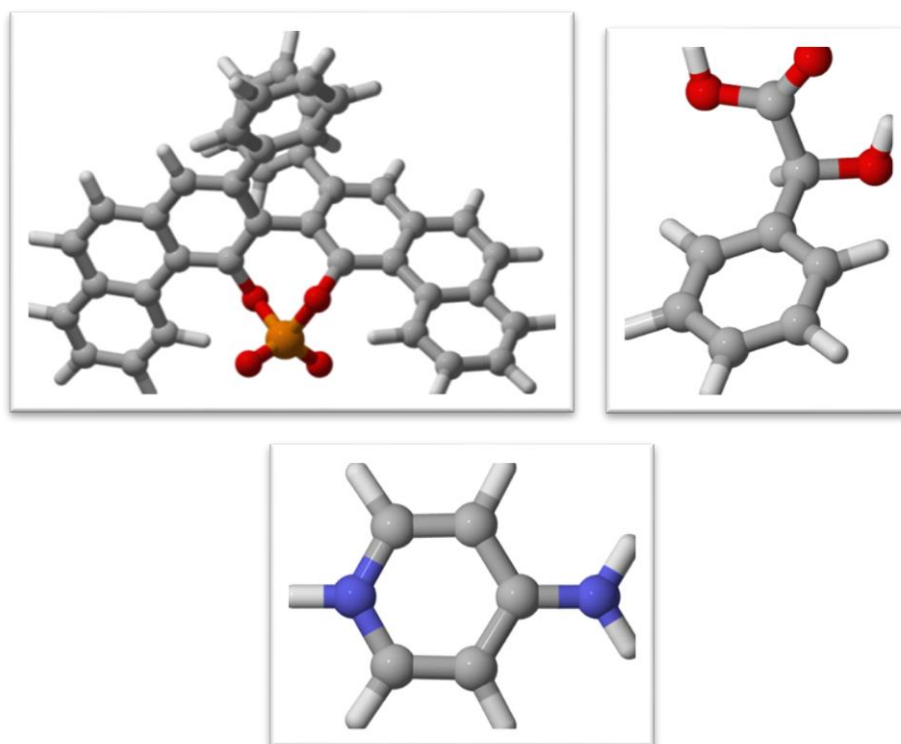

Figure S23: DFT optimized geometry of the complex R-1-I-DMAP.

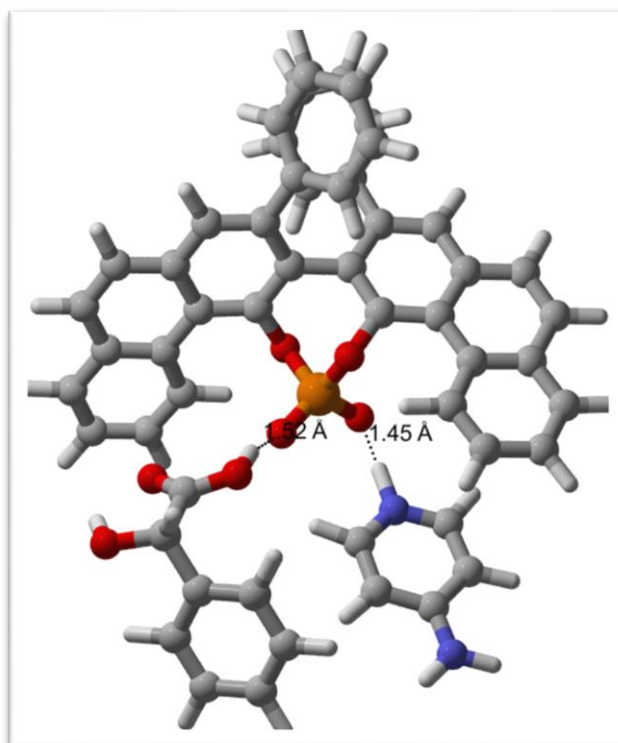

Table S4: Binding energies of different chiral assemblies.

| System               | Binding energy (kcal/mol) |
|----------------------|---------------------------|
| VAPOL-PA:1 (S)       | -104.38                   |
| VAPOL-PA:1 R)        | -108.44                   |
| VAPOL-PA:10 (R)      | -28.53                    |
| VAPOL-PA:10(S)       | -28.46                    |
| VAPOL-PA:10:<br>DMAP | -123.83                   |

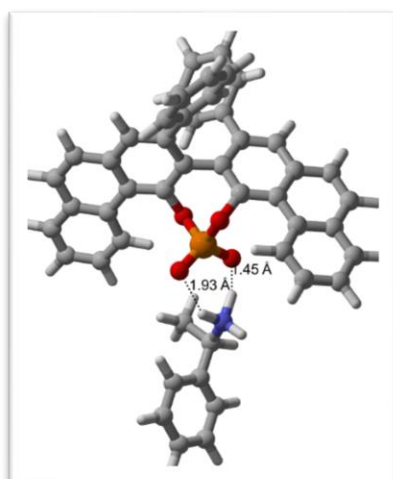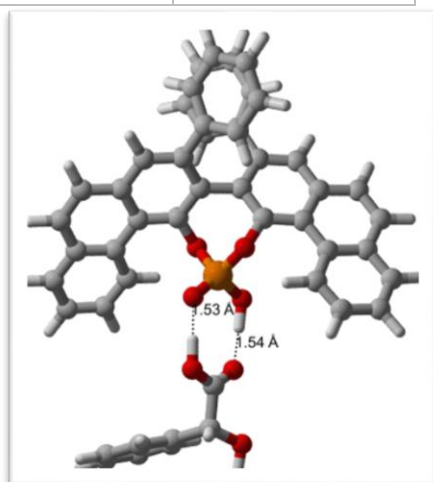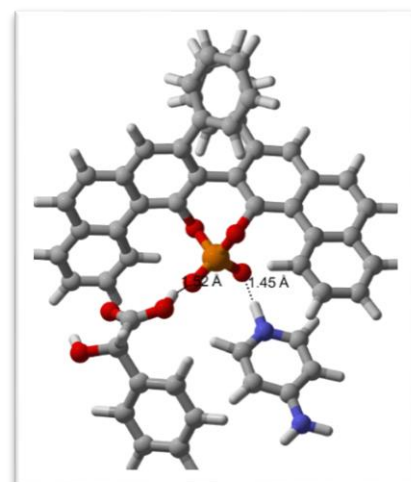

## DFT optimized coordinates of PO4-NH3-R complex in xyz format

90

|   |              |              |              |
|---|--------------|--------------|--------------|
| C | -2.488733938 | 2.209444180  | -0.683384243 |
| C | -2.033641157 | 3.513458628  | -0.768592879 |
| C | -0.864316932 | 3.956101360  | -0.131315696 |
| C | -0.071470007 | 3.054129099  | 0.633904747  |
| C | -0.534499606 | 1.719988116  | 0.660629957  |
| C | -1.733945784 | 1.298731286  | 0.101055517  |
| C | -0.413590339 | 5.293696249  | -0.337343464 |
| C | 1.144805184  | 3.535998101  | 1.262989601  |
| C | 1.568587136  | 4.870956018  | 0.988385967  |
| C | 0.767610350  | 5.722158753  | 0.171449559  |
| C | 2.763876791  | 5.359086254  | 1.552690722  |
| H | 3.069968599  | 6.373774468  | 1.313238595  |
| C | 3.521697025  | 4.585915644  | 2.402960623  |
| C | 3.082935142  | 3.294833171  | 2.723001592  |
| C | 1.927189912  | 2.783122551  | 2.167665698  |
| H | -1.028767875 | 5.953726346  | -0.942412221 |
| H | -2.562109134 | 4.216330234  | -1.405557524 |
| H | 1.117969460  | 6.732448658  | -0.020466229 |
| H | 4.435044494  | 4.979955221  | 2.837780858  |
| H | 3.645893057  | 2.690162930  | 3.428496974  |
| H | 1.608320380  | 1.790443785  | 2.447906091  |
| C | -3.674150122 | 1.807241665  | -1.477161783 |
| C | -3.692011106 | 0.627413446  | -2.232468550 |
| C | -4.803723596 | 2.635456202  | -1.529435216 |
| C | -4.802943811 | 0.282303715  | -2.990903090 |
| H | -2.823617418 | -0.019720372 | -2.241788653 |
| C | -5.914753326 | 2.291758437  | -2.289446678 |
| H | -4.816998273 | 3.553376276  | -0.948664687 |
| C | -5.922355891 | 1.107859826  | -3.019289287 |
| H | -4.789711233 | -0.637137938 | -3.567859986 |
| H | -6.779974865 | 2.947178922  | -2.305288907 |
| H | -6.791707816 | 0.832251898  | -3.607802919 |
| C | -3.254531267 | -0.522432111 | 1.041023468  |
| C | -3.644277699 | -1.846275306 | 0.955043738  |
| C | -2.955001702 | -2.798579867 | 0.193069790  |
| C | -1.730060253 | -2.460749110 | -0.454594098 |
| C | -1.347153181 | -1.103202289 | -0.338107185 |
| C | -2.133077008 | -0.122952743 | 0.270012470  |
| C | -3.460590273 | -4.129144630 | 0.125527921  |
| C | -1.009121881 | -3.497645090 | -1.177949984 |
| C | -1.560169561 | -4.816836916 | -1.202794740 |
| C | -2.790749020 | -5.098468656 | -0.541822571 |
| C | -0.895030096 | -5.848403105 | -1.893195231 |
| H | -1.342573380 | -6.838770221 | -1.891770224 |
| C | 0.286653773  | -5.618789598 | -2.559643914 |
| C | 0.827626802  | -4.328069333 | -2.554676711 |
| C | 0.197397292  | -3.297735772 | -1.886949607 |
| H | -4.397996892 | -4.345881547 | 0.629374091  |
| H | -4.517190434 | -2.173949615 | 1.511732403  |
| H | -3.182319686 | -6.110962486 | -0.587196004 |
| H | 0.787450538  | -6.425271285 | -3.085474142 |
| H | 1.754923197  | -4.126122541 | -3.083240136 |
| H | 0.639063309  | -2.316087587 | -1.917574684 |
| C | -3.905035117 | 0.320123177  | 2.077222087  |

|   |              |              |              |
|---|--------------|--------------|--------------|
| C | -4.438859941 | 1.596698128  | 1.879991172  |
| C | -3.986556513 | -0.228860806 | 3.367016591  |
| C | -5.027380542 | 2.294676057  | 2.928936933  |
| H | -4.426871928 | 2.042469715  | 0.896691335  |
| C | -4.581045656 | 0.463647827  | 4.412522402  |
| H | -3.553028539 | -1.207510572 | 3.548084279  |
| C | -5.103833284 | 1.734424115  | 4.198882158  |
| H | -5.436316258 | 3.284003539  | 2.747206710  |
| H | -4.626540343 | 0.011236031  | 5.398321721  |
| H | -5.565790505 | 2.281372042  | 5.014722610  |
| P | 1.060978653  | -0.159246023 | 0.071629712  |
| O | 0.255896123  | 0.714606925  | 1.200796272  |
| O | 1.882083529  | 0.752693111  | -0.816192059 |
| O | 1.768564816  | -1.261135341 | 0.785734654  |
| O | -0.158044255 | -0.667108099 | -0.898426129 |
| C | 5.948972164  | -2.560947194 | 0.341827117  |
| C | 7.058985778  | -3.232180138 | 0.838975706  |
| C | 8.332068345  | -2.930117765 | 0.363676142  |
| C | 8.490929361  | -1.949341374 | -0.608305525 |
| C | 7.379133159  | -1.273872704 | -1.100885132 |
| C | 6.099874245  | -1.572052455 | -0.633962814 |
| H | 4.960783609  | -2.816384123 | 0.716225358  |
| H | 6.928969226  | -3.996476032 | 1.598141855  |
| H | 9.196192923  | -3.460471096 | 0.750283746  |
| H | 9.479936191  | -1.705490696 | -0.982813611 |
| H | 7.505263536  | -0.506872536 | -1.860737894 |
| C | 4.906018970  | -0.835948141 | -1.194091084 |
| N | 4.147265462  | -0.146565644 | -0.106648766 |
| H | 3.258121386  | 0.418128255  | -0.498468563 |
| H | 3.626314298  | -0.813739903 | 0.497968749  |
| H | 4.747628767  | 0.441759454  | 0.466141723  |
| C | 3.949829615  | -1.725275298 | -1.983905431 |
| H | 3.497361725  | -2.491130171 | -1.348116901 |
| H | 3.143947994  | -1.132263444 | -2.422314067 |
| H | 4.500659229  | -2.222154089 | -2.784848673 |
| H | 5.271375896  | -0.037808059 | -1.849051516 |

## DFT optimized coordinates of PO4-NH3-S complex in xyz format

90

|   |              |              |              |
|---|--------------|--------------|--------------|
| C | -2.595382264 | 2.235089464  | -0.890129529 |
| C | -2.205237407 | 3.558055316  | -0.966014806 |
| C | -1.016927727 | 4.031962254  | -0.392611440 |
| C | -0.101902982 | 3.133368231  | 0.231651441  |
| C | -0.506622807 | 1.775727329  | 0.242465417  |
| C | -1.748703623 | 1.330142808  | -0.198882297 |
| C | -0.712282119 | 5.421931042  | -0.479327286 |
| C | 1.131291737  | 3.666573527  | 0.788730154  |
| C | 1.386358309  | 5.067858800  | 0.667596316  |
| C | 0.439522797  | 5.919837265  | 0.029835827  |
| C | 2.574080105  | 5.618864732  | 1.186981696  |
| H | 2.740497120  | 6.686303483  | 1.071698998  |
| C | 3.505422296  | 4.834631495  | 1.827636695  |
| C | 3.252925908  | 3.466783296  | 1.976833212  |
| C | 2.098364481  | 2.901455014  | 1.476398340  |
| H | -1.431586036 | 6.073204733  | -0.967061023 |
| H | -2.823520204 | 4.261812327  | -1.515561514 |
| H | 0.661310749  | 6.981281149  | -0.033120197 |
| H | 4.419014257  | 5.271409613  | 2.218134937  |
| H | 3.970885384  | 2.836539019  | 2.492449268  |
| H | 1.933212949  | 1.847369935  | 1.623344986  |
| C | -3.845877221 | 1.814608041  | -1.560693837 |
| C | -3.882773059 | 0.699857238  | -2.406189102 |
| C | -5.020369468 | 2.558793316  | -1.394762122 |
| C | -5.059942721 | 0.329800111  | -3.042654172 |
| H | -2.977004646 | 0.131289552  | -2.582594786 |
| C | -6.200313995 | 2.183899246  | -2.023420808 |
| H | -5.012281891 | 3.430471000  | -0.746063770 |
| C | -6.226281923 | 1.062389516  | -2.845274906 |
| H | -5.063164501 | -0.534247830 | -3.699667562 |
| H | -7.103032830 | 2.764933200  | -1.862501565 |
| H | -7.149154016 | 0.763007690  | -3.331565525 |
| C | -3.188718696 | -0.505602761 | 0.872834474  |
| C | -3.590455674 | -1.828549557 | 0.790260938  |
| C | -2.962453433 | -2.777640214 | -0.026868241 |
| C | -1.794980946 | -2.431051104 | -0.768675273 |
| C | -1.417568546 | -1.071444900 | -0.676207437 |
| C | -2.137798186 | -0.093447732 | 0.007142823  |
| C | -3.450333192 | -4.117530376 | -0.040598342 |
| C | -1.110816721 | -3.466321036 | -1.528921885 |
| C | -1.619913297 | -4.801094717 | -1.466989690 |
| C | -2.798359673 | -5.090780915 | -0.720345361 |
| C | -0.967507854 | -5.841125626 | -2.157040699 |
| H | -1.375054966 | -6.845424808 | -2.076409555 |
| C | 0.152783863  | -5.602294587 | -2.919634458 |
| C | 0.634932818  | -4.292568519 | -3.022206387 |
| C | 0.021013577  | -3.254767326 | -2.349067950 |
| H | -4.348658401 | -4.343085460 | 0.527054931  |
| H | -4.423208436 | -2.161756805 | 1.402372341  |
| H | -3.164126604 | -6.113862906 | -0.713541271 |
| H | 0.646644572  | -6.414666348 | -3.443334231 |
| H | 1.498827887  | -4.079182859 | -3.644616598 |
| H | 0.415558335  | -2.258880646 | -2.470991696 |
| C | -3.747296919 | 0.312661906  | 1.979880258  |

|   |              |              |              |
|---|--------------|--------------|--------------|
| C | -4.158915168 | 1.645295491  | 1.881176195  |
| C | -3.854313640 | -0.302255402 | 3.239323387  |
| C | -4.658359427 | 2.328681416  | 2.982854954  |
| H | -4.112295657 | 2.154621783  | 0.932789129  |
| C | -4.357922707 | 0.377706674  | 4.339816786  |
| H | -3.507459131 | -1.323500788 | 3.359472368  |
| C | -4.762606656 | 1.702429141  | 4.218738157  |
| H | -4.972155448 | 3.361565462  | 2.867793172  |
| H | -4.422161881 | -0.127259779 | 5.298901015  |
| H | -5.147278903 | 2.242261250  | 5.078473167  |
| P | 1.005618577  | -0.229239135 | -0.367613371 |
| O | 0.343919996  | 0.788328959  | 0.723033094  |
| O | 2.079502594  | 0.334379311  | -1.199547451 |
| O | 1.322222699  | -1.450601893 | 0.531968488  |
| O | -0.259355027 | -0.628437614 | -1.308556398 |
| C | 6.340647688  | -3.096479229 | -0.461605504 |
| C | 7.618607515  | -3.603712583 | -0.665266708 |
| C | 8.731186114  | -2.793449909 | -0.472836576 |
| C | 8.547746966  | -1.474197159 | -0.076683190 |
| C | 7.266918398  | -0.973402463 | 0.130331904  |
| C | 6.136214126  | -1.774398179 | -0.054738982 |
| H | 5.499017094  | -3.761371593 | -0.634074583 |
| H | 7.741391976  | -4.636163743 | -0.976506770 |
| H | 9.729551886  | -3.186869073 | -0.631791170 |
| H | 9.405364293  | -0.826875813 | 0.076122443  |
| H | 7.155140161  | 0.059176857  | 0.439939868  |
| C | 4.731197954  | -1.212350567 | 0.138673154  |
| C | 4.664091830  | -0.030174403 | 1.097658545  |
| H | 3.627337291  | 0.268125810  | 1.250745999  |
| H | 5.112531944  | -0.273858178 | 2.066792820  |
| H | 5.178655465  | 0.840500148  | 0.689202911  |
| N | 3.752793910  | -2.236575346 | 0.589975641  |
| H | 2.364826110  | -1.762330176 | 0.552791761  |
| H | 3.769644797  | -3.045955033 | -0.024081568 |
| H | 4.003366396  | -2.572986792 | 1.518244226  |
| H | 4.351293704  | -0.866212068 | -0.831274641 |

DFT optimized coordinates of PO4-COOH-R complex in xyz format

89

|   |              |              |              |
|---|--------------|--------------|--------------|
| C | -3.072948322 | 2.434370962  | -1.095509617 |
| C | -2.507038781 | 3.694707290  | -1.070915591 |
| C | -1.217716869 | 3.944380014  | -0.574781594 |
| C | -0.431088534 | 2.880205021  | -0.045703971 |
| C | -1.026690484 | 1.603400310  | -0.123536395 |
| C | -2.313072200 | 1.348802664  | -0.587044558 |
| C | -0.660912893 | 5.252874002  | -0.680992236 |
| C | 0.902634364  | 3.163253527  | 0.459582251  |
| C | 1.434389360  | 4.472172264  | 0.253902802  |
| C | 0.623521034  | 5.493992952  | -0.321164348 |
| C | 2.754929082  | 4.765316395  | 0.646116184  |
| H | 3.138956224  | 5.762666988  | 0.450677836  |
| C | 3.541913092  | 3.822461479  | 1.267343773  |
| C | 3.000493912  | 2.562802626  | 1.546908939  |
| C | 1.715611729  | 2.243109993  | 1.159006079  |
| H | -1.281036947 | 6.044241181  | -1.092740975 |
| H | -3.057691068 | 4.525332652  | -1.502120490 |
| H | 1.058339744  | 6.481075167  | -0.450086617 |
| H | 4.562881069  | 4.056773623  | 1.551800781  |
| H | 3.595136154  | 1.821005459  | 2.071030097  |
| H | 1.334239269  | 1.266075084  | 1.411655234  |
| C | -4.410026354 | 2.253675737  | -1.697317720 |
| C | -4.646181357 | 1.267218870  | -2.662422654 |
| C | -5.469658108 | 3.083868580  | -1.317494517 |
| C | -5.909949905 | 1.104102879  | -3.213801962 |
| H | -3.830490451 | 0.630896914  | -2.989664473 |
| C | -6.732173159 | 2.923466931  | -1.872398586 |
| H | -5.309518184 | 3.825540152  | -0.541482721 |
| C | -6.959237638 | 1.929378371  | -2.818235808 |
| H | -6.074307853 | 0.330870656  | -3.958366901 |
| H | -7.546838793 | 3.564638572  | -1.549321550 |
| H | -7.948526255 | 1.797832378  | -3.245788827 |
| C | -4.045934727 | -0.353073207 | 0.164662517  |
| C | -4.505017304 | -1.653980513 | 0.104664119  |
| C | -3.850217388 | -2.665351462 | -0.611436322 |
| C | -2.643722824 | -2.387990401 | -1.318015351 |
| C | -2.179650634 | -1.059043342 | -1.200763428 |
| C | -2.849497223 | -0.036907990 | -0.530893990 |
| C | -4.375964326 | -3.989491892 | -0.585554198 |
| C | -2.000299925 | -3.458424447 | -2.065050314 |
| C | -2.554948776 | -4.772257638 | -1.974661812 |
| C | -3.741593400 | -5.003847594 | -1.220473843 |
| C | -1.947788567 | -5.843509946 | -2.659100714 |
| H | -2.387374981 | -6.831535848 | -2.559565442 |
| C | -0.835563645 | -5.652809340 | -3.445790489 |
| C | -0.311867421 | -4.362838098 | -3.577674479 |
| C | -0.877967221 | -3.297341966 | -2.908858721 |
| H | -5.289195352 | -4.166346766 | -0.025337702 |
| H | -5.394110113 | -1.921648706 | 0.666866395  |
| H | -4.136489104 | -6.014880889 | -1.181493438 |
| H | -0.379358524 | -6.487066616 | -3.969538542 |
| H | 0.549325913  | -4.187857959 | -4.214819639 |
| H | -0.452607670 | -2.319471942 | -3.061064763 |
| C | -4.802393582 | 0.627525916  | 0.970306708  |



|   |              |              |              |
|---|--------------|--------------|--------------|
| C | -6.195546690 | 0.694287885  | 0.851537315  |
| C | -4.169365014 | 1.485737315  | 1.876939193  |
| C | -6.934246743 | 1.594381839  | 1.607009670  |
| H | -6.692968802 | 0.066427314  | 0.119242965  |
| C | -4.907843976 | 2.388334370  | 2.631194825  |
| H | -3.092340974 | 1.440172514  | 1.997317313  |
| C | -6.292709793 | 2.447921788  | 2.498885753  |
| H | -8.011683439 | 1.643621397  | 1.481963912  |
| H | -4.398719929 | 3.044476008  | 3.330795006  |
| H | -6.867992689 | 3.158493480  | 3.084283388  |
| P | 0.312201409  | -0.374383208 | -0.953934693 |
| O | -0.285915398 | 0.478487815  | 0.267917787  |
| O | 1.292742670  | 0.324400475  | -1.819150043 |
| O | 0.802760667  | -1.661195190 | -0.238850921 |
| O | -0.988372240 | -0.700784415 | -1.835888776 |
| C | 6.646515157  | -1.408423017 | 0.219447128  |
| C | 7.496360585  | -0.572268696 | 0.934458374  |
| C | 8.027777106  | 0.565635879  | 0.335265792  |
| C | 7.710683497  | 0.864103477  | -0.986768883 |
| C | 6.867916549  | 0.024487065  | -1.705103493 |
| C | 6.332216340  | -1.116589038 | -1.108227850 |
| H | 6.225484626  | -2.296192484 | 0.680831897  |
| H | 7.748096956  | -0.812259710 | 1.962643920  |
| H | 8.689755573  | 1.216849238  | 0.896783152  |
| H | 8.128726610  | 1.745986360  | -1.462152973 |
| H | 6.616794744  | 0.255220725  | -2.736261086 |
| C | 5.404886019  | -2.031002969 | -1.893202803 |
| H | 5.577871317  | -1.863419799 | -2.966209754 |
| C | 3.956640538  | -1.616609327 | -1.629468793 |
| O | 3.229456452  | -2.227536517 | -0.850317530 |
| O | 3.642170388  | -0.541456023 | -2.309213724 |
| H | 2.699755855  | -0.200191108 | -2.089060407 |
| H | 1.770808456  | -1.904993058 | -0.491235718 |
| O | 5.537984545  | -3.398913183 | -1.560113702 |
| H | 6.474395540  | -3.618166255 | -1.638894653 |

DFT optimized coordinates of PO4-COOH-S complex in xyz format

89

|   |              |              |              |
|---|--------------|--------------|--------------|
| C | -1.501793698 | 2.748836459  | -0.169584406 |
| C | -0.881234373 | 3.977111189  | -0.055522193 |
| C | 0.319025439  | 4.169079476  | 0.641822867  |
| C | 0.981017808  | 3.070230474  | 1.262882077  |
| C | 0.349189586  | 1.820318865  | 1.076604312  |
| C | -0.876151012 | 1.630989932  | 0.442653249  |
| C | 0.905804624  | 5.467343252  | 0.666815260  |
| C | 2.220966763  | 3.311935880  | 1.986179633  |
| C | 2.775268956  | 4.628915003  | 1.952808156  |
| C | 2.096158066  | 5.682211090  | 1.275463262  |
| C | 3.988630588  | 4.902987890  | 2.612382446  |
| H | 4.387974346  | 5.911887729  | 2.554051969  |
| C | 4.652839723  | 3.929019312  | 3.321310957  |
| C | 4.096856125  | 2.647263609  | 3.398221809  |
| C | 2.914141611  | 2.347725876  | 2.752386910  |
| H | 0.380391791  | 6.274944916  | 0.165904357  |
| H | -1.315476962 | 4.833884290  | -0.561761320 |
| H | 2.550414180  | 6.669258181  | 1.271156728  |
| H | 5.588123233  | 4.154578350  | 3.823591745  |
| H | 4.597886093  | 1.872978103  | 3.971057868  |
| H | 2.515884461  | 1.351439668  | 2.855146648  |
| C | -2.746691808 | 2.656706563  | -0.959785789 |
| C | -2.957146364 | 1.640042279  | -1.898733036 |
| C | -3.739788496 | 3.630626281  | -0.801819887 |
| C | -4.127309733 | 1.595015424  | -2.645314545 |
| H | -2.194064970 | 0.885541012  | -2.056184034 |
| C | -4.906185259 | 3.589369798  | -1.552528179 |
| H | -3.609054145 | 4.401116816  | -0.048554038 |
| C | -5.106673940 | 2.569019838  | -2.476307873 |
| H | -4.269838411 | 0.798576004  | -3.369250719 |
| H | -5.668793780 | 4.347242863  | -1.402653699 |
| H | -6.018780522 | 2.533443301  | -3.063868599 |
| C | -2.793018406 | 0.067429360  | 0.992087373  |
| C | -3.334225137 | -1.198774555 | 0.902403985  |
| C | -2.670383423 | -2.269966174 | 0.288409080  |
| C | -1.374328831 | -2.092118190 | -0.279117859 |
| C | -0.828707805 | -0.797348558 | -0.121405647 |
| C | -1.501052660 | 0.282058880  | 0.446755262  |
| C | -3.289584122 | -3.553152935 | 0.276356458  |
| C | -0.739944639 | -3.218558155 | -0.948594316 |
| C | -1.401192386 | -4.485657101 | -0.913133770 |
| C | -2.670037611 | -4.621411439 | -0.278789419 |
| C | -0.818498333 | -5.605952811 | -1.536295416 |
| H | -1.344402493 | -6.555096802 | -1.482062841 |
| C | 0.375661151  | -5.507791238 | -2.212314724 |
| C | 1.011725699  | -4.264304903 | -2.287858989 |
| C | 0.470841236  | -3.152839623 | -1.674157794 |
| H | -4.267797127 | -3.652208503 | 0.737611187  |
| H | -4.304080599 | -1.390572909 | 1.351701994  |
| H | -3.139213273 | -5.601207261 | -0.268701900 |
| H | 0.810574630  | -6.378476103 | -2.691996334 |
| H | 1.942192717  | -4.163059124 | -2.837935863 |
| H | 0.986835350  | -2.212671897 | -1.779042918 |
| C | -3.568531522 | 1.128506917  | 1.666785651  |

|   |              |              |              |
|---|--------------|--------------|--------------|
| C | -4.904371628 | 1.341147775  | 1.310925684  |
| C | -3.010169960 | 1.921819739  | 2.675129223  |
| C | -5.659805688 | 2.322524187  | 1.937971709  |
| H | -5.333218704 | 0.762969287  | 0.497737874  |
| C | -3.766360333 | 2.902616856  | 3.303168585  |
| H | -1.980529558 | 1.761154204  | 2.975825115  |
| C | -5.093263875 | 3.108651811  | 2.935748008  |
| H | -6.688277336 | 2.486755767  | 1.630932121  |
| H | -3.318306099 | 3.504911327  | 4.086798074  |
| H | -5.681578019 | 3.877931368  | 3.426017081  |
| P | 1.654507252  | -0.248982166 | 0.414138275  |
| O | 0.974241007  | 0.657842249  | 1.552955116  |
| O | 2.760513068  | 0.386578487  | -0.343082472 |
| O | 1.998405951  | -1.542191447 | 1.195862403  |
| O | 0.451617057  | -0.530971376 | -0.611597533 |
| C | 8.065821759  | -0.561505271 | 1.265183033  |
| C | 8.758405571  | -0.119117003 | 2.385908495  |
| C | 8.798169479  | -0.899308531 | 3.537904999  |
| C | 8.146712549  | -2.128704100 | 3.563233149  |
| C | 7.463669332  | -2.578687920 | 2.439168079  |
| C | 7.422376604  | -1.800133455 | 1.283653784  |
| H | 8.015388136  | 0.049370586  | 0.369582118  |
| H | 9.265011189  | 0.840579860  | 2.359129031  |
| H | 9.337382761  | -0.551415827 | 4.413011841  |
| H | 8.177266052  | -2.743319229 | 4.457143598  |
| H | 6.953833272  | -3.536928159 | 2.458388635  |
| C | 6.659687845  | -2.284331392 | 0.063072865  |
| H | 6.527362659  | -3.371931451 | 0.137385304  |
| C | 5.251984075  | -1.694968466 | 0.116057398  |
| O | 4.373670629  | -2.311919040 | 0.730950455  |
| O | 5.122185329  | -0.542675180 | -0.470533204 |
| H | 4.163304019  | -0.172793852 | -0.397655471 |
| H | 2.964941078  | -1.864001119 | 1.002379962  |
| O | 7.264152031  | -1.921198585 | -1.166103561 |
| H | 8.188101430  | -2.193698894 | -1.121612242 |

## DFT optimized coordinates of PO4-COOH-NH complex in xyz format

102

|   |              |              |              |
|---|--------------|--------------|--------------|
| C | -1.887845577 | 2.890722120  | -0.710015479 |
| C | -1.289262505 | 4.133043740  | -0.626358764 |
| C | -0.016744546 | 4.325691113  | -0.070391656 |
| C | 0.732895751  | 3.217009867  | 0.418659915  |
| C | 0.119988561  | 1.952533289  | 0.261835939  |
| C | -1.173451776 | 1.767679566  | -0.223325052 |
| C | 0.550904274  | 5.633147801  | -0.052111743 |
| C | 2.041561094  | 3.456693896  | 1.005630943  |
| C | 2.576436191  | 4.781439809  | 0.960114495  |
| C | 1.803706276  | 5.849015043  | 0.417664230  |
| C | 3.857800534  | 5.042932036  | 1.485495248  |
| H | 4.241454895  | 6.058151629  | 1.426756366  |
| C | 4.602094303  | 4.051476689  | 2.085564391  |
| C | 4.059740905  | 2.765375436  | 2.191777297  |
| C | 2.816908537  | 2.475530601  | 1.665589663  |
| H | -0.042729472 | 6.454060325  | -0.443651456 |
| H | -1.804096488 | 4.994871156  | -1.040152488 |
| H | 2.234549370  | 6.846188054  | 0.410880127  |
| H | 5.585099341  | 4.270408048  | 2.492189979  |
| H | 4.618783293  | 1.977827528  | 2.689493685  |
| H | 2.428427314  | 1.474659206  | 1.774401031  |
| C | -3.218868025 | 2.776116273  | -1.338362966 |
| C | -3.478261203 | 1.820945024  | -2.327601106 |
| C | -4.246595646 | 3.648541044  | -0.965337609 |
| C | -4.731432089 | 1.739171741  | -2.919601531 |
| H | -2.690290236 | 1.145295029  | -2.642481921 |
| C | -5.500435127 | 3.565395321  | -1.556233912 |
| H | -4.069816419 | 4.362497691  | -0.167052073 |
| C | -5.748408689 | 2.608431060  | -2.535176653 |
| H | -4.913304946 | 0.995476077  | -3.689626111 |
| H | -6.290816173 | 4.239063246  | -1.238798792 |
| H | -6.727617991 | 2.538422862  | -2.999437780 |
| C | -2.944375605 | 0.147617601  | 0.582690456  |
| C | -3.440876256 | -1.140765053 | 0.583870327  |
| C | -2.826944476 | -2.194188269 | -0.109181562 |
| C | -1.642868512 | -1.971021856 | -0.872194848 |
| C | -1.147040621 | -0.645875763 | -0.834179659 |
| C | -1.767696044 | 0.406607797  | -0.163685933 |
| C | -3.367225659 | -3.507519030 | 0.008353204  |
| C | -1.039940348 | -3.093710324 | -1.577006141 |
| C | -1.602789347 | -4.393717031 | -1.388826517 |
| C | -2.766254371 | -4.566253756 | -0.585709754 |
| C | -1.023852883 | -5.513341829 | -2.015523285 |
| H | -1.468449313 | -6.488667253 | -1.837782993 |
| C | 0.071847686  | -5.384861162 | -2.836603298 |
| C | 0.602280792  | -4.111609339 | -3.065476885 |
| C | 0.060403390  | -2.998286024 | -2.457024568 |
| H | -4.262511495 | -3.639239784 | 0.608702058  |
| H | -4.314968412 | -1.368294108 | 1.186923272  |
| H | -3.168444005 | -5.568889099 | -0.469496751 |
| H | 0.513203267  | -6.257924940 | -3.306997715 |
| H | 1.454921668  | -3.990041787 | -3.726866824 |
| H | 0.494322206  | -2.035923776 | -2.671563082 |
| C | -3.627427076 | 1.177852876  | 1.392988693  |

|   |              |              |              |
|---|--------------|--------------|--------------|
| C | -5.014889149 | 1.329795200  | 1.299298106  |
| C | -2.928006865 | 1.997774546  | 2.286602019  |
| C | -5.682604198 | 2.274998398  | 2.066655152  |
| H | -5.565103507 | 0.728266214  | 0.582483470  |
| C | -3.594440873 | 2.946268639  | 3.051197137  |
| H | -1.854529666 | 1.884898317  | 2.390421870  |
| C | -4.974827776 | 3.091103461  | 2.943142544  |
| H | -6.758062661 | 2.386511708  | 1.966325352  |
| H | -3.033203537 | 3.570952469  | 3.739882571  |
| H | -5.495046761 | 3.834500201  | 3.539481553  |
| P | 1.366851696  | -0.092914170 | -0.644599949 |
| O | 0.809446261  | 0.803253547  | 0.611997958  |
| O | 2.277555089  | 0.719906106  | -1.524703967 |
| O | 1.898764283  | -1.349848364 | -0.048756176 |
| O | 0.018074058  | -0.318867153 | -1.518385538 |
| H | 3.647534583  | 0.626126240  | -1.071596645 |
| C | 5.033434872  | -0.614755185 | -0.062244251 |
| C | 6.244569897  | -0.741018543 | 0.568152039  |
| C | 7.119105946  | 0.364139578  | 0.618605819  |
| C | 6.699462382  | 1.561928628  | 0.004818059  |
| C | 5.470811338  | 1.613460701  | -0.601930475 |
| N | 4.666535775  | 0.542173489  | -0.642217901 |
| H | 4.298393527  | -1.411740709 | -0.108081077 |
| H | 6.501421030  | -1.684460562 | 1.038524769  |
| H | 7.319527923  | 2.450557881  | 0.028561050  |
| H | 5.081774241  | 2.517579448  | -1.055280292 |
| N | 8.313930448  | 0.279077876  | 1.245666188  |
| H | 8.596219853  | -0.570872835 | 1.701774263  |
| H | 8.925038487  | 1.073744033  | 1.314151027  |
| C | 5.075451532  | -3.694896758 | 3.192362231  |
| C | 6.447236835  | -3.476994839 | 3.130296850  |
| C | 7.272155052  | -4.379294263 | 2.461723203  |
| C | 6.712025968  | -5.501550589 | 1.860011283  |
| C | 5.340188171  | -5.722406239 | 1.927174665  |
| C | 4.509563647  | -4.821405981 | 2.591134450  |
| H | 4.436885779  | -2.987106495 | 3.711823317  |
| H | 6.874667683  | -2.610383043 | 3.628564028  |
| H | 8.346806891  | -4.223819948 | 2.431442476  |
| H | 7.347168529  | -6.218073604 | 1.347782877  |
| H | 4.897604217  | -6.607402649 | 1.483301512  |
| C | 3.008580215  | -5.066496182 | 2.651702020  |
| H | 2.649013566  | -4.772102549 | 3.649154134  |
| O | 1.703135520  | -4.694204275 | 0.680004978  |
| O | 2.364422576  | -2.895045443 | 1.889026183  |
| C | 2.278874407  | -4.181548200 | 1.622569401  |
| O | 2.670191829  | -6.407086320 | 2.398031152  |
| H | 2.136026215  | -6.362491236 | 1.580054656  |
| H | 2.022576361  | -2.321990957 | 1.116151492  |

## DFT optimized coordinates of PO4-OH-R complex in xyz format

89

|   |              |              |              |
|---|--------------|--------------|--------------|
| C | -1.685599466 | 2.162204915  | -0.926215423 |
| C | -1.004347856 | 3.359374644  | -0.832650908 |
| C | 0.219621753  | 3.486283669  | -0.157761077 |
| C | 0.825260771  | 2.358177219  | 0.468600409  |
| C | 0.116730436  | 1.145665636  | 0.325252140  |
| C | -1.121172878 | 1.024873989  | -0.294014059 |
| C | 0.898775117  | 4.738709471  | -0.176300639 |
| C | 2.104454617  | 2.522676565  | 1.142251761  |
| C | 2.768821042  | 3.782719578  | 1.027785858  |
| C | 2.134420558  | 4.872479176  | 0.363153810  |
| C | 4.045632258  | 3.961114768  | 1.594657853  |
| H | 4.532620808  | 4.924522526  | 1.471796545  |
| C | 4.663449811  | 2.952569789  | 2.298635738  |
| C | 3.988611943  | 1.741841611  | 2.481168121  |
| C | 2.742701633  | 1.533251336  | 1.924585749  |
| H | 0.406901295  | 5.575734032  | -0.662694027 |
| H | -1.396266924 | 4.231956662  | -1.347362294 |
| H | 2.661041154  | 5.821349816  | 0.311024339  |
| H | 5.653676127  | 3.097955452  | 2.719051162  |
| H | 4.451172251  | 0.948278890  | 3.059233686  |
| H | 2.254721984  | 0.587618366  | 2.103196367  |
| C | -2.926705750 | 2.089452677  | -1.726294652 |
| C | -3.092586599 | 1.111721611  | -2.714084018 |
| C | -3.955651016 | 3.014981131  | -1.525420312 |
| C | -4.258724078 | 1.051541425  | -3.465333989 |
| H | -2.295030810 | 0.400370511  | -2.900564879 |
| C | -5.124628414 | 2.951454446  | -2.272950091 |
| H | -3.854638638 | 3.757365700  | -0.739912639 |
| C | -5.283516185 | 1.967112293  | -3.242603153 |
| H | -4.367781774 | 0.286416902  | -4.227709150 |
| H | -5.923751025 | 3.660978418  | -2.081209951 |
| H | -6.200838591 | 1.910590396  | -3.820444146 |
| C | -3.125925114 | -0.366350060 | 0.340664054  |
| C | -3.794696979 | -1.568907603 | 0.240675708  |
| C | -3.254838231 | -2.685469141 | -0.414665291 |
| C | -1.944175364 | -2.642964253 | -0.978265779 |
| C | -1.266279327 | -1.411648945 | -0.811903328 |
| C | -1.838573213 | -0.273742073 | -0.247005035 |
| C | -4.023123244 | -3.883613131 | -0.475217105 |
| C | -1.435364764 | -3.824175045 | -1.663333643 |
| C | -2.253488360 | -4.996742286 | -1.691895273 |
| C | -3.539915103 | -4.995033823 | -1.079274854 |
| C | -1.799426612 | -6.160537648 | -2.342818723 |
| H | -2.442814025 | -7.035972478 | -2.339032587 |
| C | -0.580537629 | -6.196526480 | -2.979974022 |
| C | 0.216363611  | -5.047286072 | -2.981361957 |
| C | -0.197104517 | -3.897104858 | -2.340575544 |
| H | -5.007386749 | -3.880466450 | -0.016144276 |
| H | -4.768997914 | -1.675383436 | 0.708834046  |
| H | -4.130689454 | -5.905962147 | -1.116310744 |
| H | -0.243870991 | -7.099982509 | -3.478499908 |
| H | 1.176453676  | -5.052289783 | -3.488224066 |
| H | 0.449187985  | -3.036434897 | -2.374202860 |
| C | -3.745858125 | 0.750974358  | 1.086334403  |

|   |              |              |              |
|---|--------------|--------------|--------------|
| C | -5.076015298 | 1.108402531  | 0.839752770  |
| C | -3.041037917 | 1.456157717  | 2.070132726  |
| C | -5.680525995 | 2.141490087  | 1.544296673  |
| H | -5.623305870 | 0.600468383  | 0.051558340  |
| C | -3.646288589 | 2.487709686  | 2.776306725  |
| H | -2.013848269 | 1.188051338  | 2.294176747  |
| C | -4.968108301 | 2.838001948  | 2.515082916  |
| H | -6.707179144 | 2.414209371  | 1.319158197  |
| H | -3.081628315 | 3.019809335  | 3.535585335  |
| H | -5.435982928 | 3.649247046  | 3.065060607  |
| P | 1.256431949  | -1.073332166 | -0.264406888 |
| O | 0.661489906  | -0.034292015 | 0.827892535  |
| O | 2.232518688  | -0.281615285 | -1.207465410 |
| O | 1.792101316  | -2.256729987 | 0.419889345  |
| O | 0.032360969  | -1.269737605 | -1.297713233 |
| C | 7.583023823  | -1.576696099 | 0.801825115  |
| C | 8.614403687  | -1.362832013 | 1.710791830  |
| C | 9.054233331  | -0.070917126 | 1.978826585  |
| C | 8.452668567  | 1.007919937  | 1.337774068  |
| C | 7.421783492  | 0.790726075  | 0.433002869  |
| C | 6.975837538  | -0.502242012 | 0.150610860  |
| H | 7.258216156  | -2.592964075 | 0.600877512  |
| H | 9.077808874  | -2.209326321 | 2.207467888  |
| H | 9.863668168  | 0.095466045  | 2.682498870  |
| H | 8.790103096  | 2.019697942  | 1.540739317  |
| H | 6.947296325  | 1.633953865  | -0.061590804 |
| C | 5.815928391  | -0.678179577 | -0.803703628 |
| O | 4.566429265  | -0.533303310 | -0.072193852 |
| H | 3.172261249  | -0.336277358 | -0.841598557 |
| C | 5.812283905  | -1.954142925 | -1.626780157 |
| H | 5.718073675  | -2.845070155 | -0.997668679 |
| H | 4.969426113  | -1.946268060 | -2.321810116 |
| H | 6.737327186  | -2.045303705 | -2.201778318 |
| H | 5.805171213  | 0.185154334  | -1.476859403 |
| H | 4.439760623  | -1.306960702 | 0.496589872  |

## DFT optimized coordinates of PO4-OH-S complex in xyz format

89

|   |              |              |              |
|---|--------------|--------------|--------------|
| C | -1.411848048 | 2.442810376  | -0.547006479 |
| C | -0.740896825 | 3.628810439  | -0.329467635 |
| C | 0.255165302  | 3.761741058  | 0.649537322  |
| C | 0.636364716  | 2.648151395  | 1.454702792  |
| C | 0.000291915  | 1.428721155  | 1.134298811  |
| C | -1.050881574 | 1.316447698  | 0.231776713  |
| C | 0.930837011  | 5.008455831  | 0.796858847  |
| C | 1.614014352  | 2.846600768  | 2.510794336  |
| C | 2.280640754  | 4.107367217  | 2.591221965  |
| C | 1.927910707  | 5.163506573  | 1.701188633  |
| C | 3.253981262  | 4.325200378  | 3.585227195  |
| H | 3.761242667  | 5.285841478  | 3.608081933  |
| C | 3.543109116  | 3.361692723  | 4.524867483  |
| C | 2.840465885  | 2.152078061  | 4.499039523  |
| C | 1.905656966  | 1.898239476  | 3.515354809  |
| H | 0.634999633  | 5.827935823  | 0.148167676  |
| H | -0.964172675 | 4.486829808  | -0.956878236 |
| H | 2.453124941  | 6.110521883  | 1.788036757  |
| H | 4.290803224  | 3.545717827  | 5.289491394  |
| H | 3.028168385  | 1.399131570  | 5.258334614  |
| H | 1.377597385  | 0.957172592  | 3.534613353  |
| C | -2.425483896 | 2.355915238  | -1.619438627 |
| C | -2.314390112 | 1.394140518  | -2.629905487 |
| C | -3.496547095 | 3.252882187  | -1.660663004 |
| C | -3.252790385 | 1.329057470  | -3.650762903 |
| H | -1.476850508 | 0.704108924  | -2.621478462 |
| C | -4.437640377 | 3.185219543  | -2.681108982 |
| H | -3.610843364 | 3.978455701  | -0.861044784 |
| C | -4.320470583 | 2.221960479  | -3.677586666 |
| H | -3.146336364 | 0.580549889  | -4.429652609 |
| H | -5.272485324 | 3.879185871  | -2.690040256 |
| H | -5.057900559 | 2.165475307  | -4.472214184 |
| C | -3.186872437 | -0.027710310 | 0.427665323  |
| C | -3.823732563 | -1.237736074 | 0.235869538  |
| C | -3.163143163 | -2.381012214 | -0.236872020 |
| C | -1.766492986 | -2.348567621 | -0.526330229 |
| C | -1.137732607 | -1.110931512 | -0.268605583 |
| C | -1.801778825 | 0.041628127  | 0.131327029  |
| C | -3.888336596 | -3.601445536 | -0.361186628 |
| C | -1.119699994 | -3.551073530 | -1.025752419 |
| C | -1.889753663 | -4.752311761 | -1.096438638 |
| C | -3.271657319 | -4.743771499 | -0.748138419 |
| C | -1.292219318 | -5.947659927 | -1.540522906 |
| H | -1.900921038 | -6.847139432 | -1.568145211 |
| C | 0.022967158  | -5.982820850 | -1.943506197 |
| C | 0.770541239  | -4.800290789 | -1.928488987 |
| C | 0.215286667  | -3.618099765 | -1.483669305 |
| H | -4.946893780 | -3.593728514 | -0.117474315 |
| H | -4.871247691 | -1.329495651 | 0.507390753  |
| H | -3.825928032 | -5.675504629 | -0.817212864 |
| H | 0.469749559  | -6.912046022 | -2.282372072 |
| H | 1.801178764  | -4.805073431 | -2.269266061 |
| H | 0.822921881  | -2.727971049 | -1.504945651 |
| C | -3.946149603 | 1.101781726  | 1.004812663  |



|   |              |              |              |
|---|--------------|--------------|--------------|
| C | -5.225992484 | 1.409834038  | 0.528504156  |
| C | -3.437088419 | 1.852696361  | 2.071439654  |
| C | -5.970774891 | 2.434499802  | 1.097414169  |
| H | -5.622572048 | 0.860393876  | -0.319505685 |
| C | -4.179432651 | 2.880497552  | 2.637149798  |
| H | -2.457216094 | 1.619473578  | 2.472915299  |
| C | -5.449873228 | 3.177057969  | 2.152399798  |
| H | -6.958357307 | 2.662208691  | 0.708124165  |
| H | -3.765201461 | 3.445316972  | 3.467006131  |
| H | -6.029895692 | 3.980120060  | 2.595951383  |
| P | 1.132075607  | -0.893983134 | 0.906044763  |
| O | 0.397368256  | 0.251687565  | 1.773652424  |
| O | 2.465815180  | -0.300505232 | 0.335643477  |
| O | 1.257997143  | -2.127780029 | 1.705794559  |
| O | 0.244617600  | -0.979654364 | -0.436970038 |
| C | 6.543747646  | 0.017701197  | 2.471740842  |
| C | 7.695562922  | 0.610003988  | 1.959866826  |
| C | 8.412379733  | -0.014097263 | 0.947039086  |
| C | 7.976388703  | -1.240215006 | 0.451178017  |
| C | 6.832790298  | -1.832427711 | 0.967913274  |
| C | 6.099381227  | -1.209206175 | 1.982180421  |
| H | 5.991855932  | 0.527259098  | 3.254501503  |
| H | 8.026898306  | 1.565751553  | 2.353814693  |
| H | 9.305782570  | 0.451447437  | 0.543030904  |
| H | 8.529604787  | -1.735761382 | -0.340503822 |
| H | 6.489554927  | -2.784068933 | 0.573961194  |
| C | 4.851793012  | -1.894502055 | 2.494007919  |
| O | 4.014922846  | -2.141868738 | 1.331965059  |
| H | 3.235540385  | -0.882845708 | 0.655382813  |
| C | 4.077316341  | -1.144584729 | 3.561393989  |
| H | 3.797420917  | -0.146610929 | 3.217017995  |
| H | 3.159562547  | -1.684767794 | 3.808182458  |
| H | 4.664145377  | -1.042204259 | 4.478720391  |
| H | 5.143019289  | -2.880190208 | 2.888060505  |
| H | 3.165940536  | -2.524621082 | 1.639498226  |

## DFT optimized coordinates of PO4-OH-NH3-R complex in xyz format

102

|   |              |              |              |
|---|--------------|--------------|--------------|
| C | -1.490359657 | 2.190067377  | -1.407427245 |
| C | -0.820396272 | 3.399048649  | -1.374619144 |
| C | 0.364672084  | 3.581668747  | -0.647286247 |
| C | 0.964470879  | 2.489052222  | 0.044291509  |
| C | 0.340636997  | 1.231979940  | -0.143594537 |
| C | -0.908657466 | 1.083661659  | -0.740200471 |
| C | 0.990669090  | 4.862785967  | -0.622289427 |
| C | 2.108439341  | 2.742168557  | 0.903034783  |
| C | 2.674618730  | 4.053951115  | 0.916471267  |
| C | 2.111758571  | 5.084303938  | 0.108117243  |
| C | 3.766952673  | 4.338494820  | 1.758207825  |
| H | 4.180463865  | 5.343512568  | 1.741239120  |
| C | 4.290809368  | 3.381817827  | 2.599298315  |
| C | 3.730462340  | 2.100334721  | 2.606696041  |
| C | 2.672103613  | 1.785990046  | 1.777548025  |
| H | 0.539507302  | 5.663544699  | -1.201533218 |
| H | -1.221984780 | 4.240994007  | -1.931298330 |
| H | 2.579799543  | 6.065186880  | 0.120081588  |
| H | 5.123391589  | 3.621810643  | 3.253728126  |
| H | 4.133023415  | 1.331582397  | 3.258653299  |
| H | 2.275370265  | 0.782554513  | 1.802497119  |
| C | -2.750091500 | 2.084734940  | -2.172008457 |
| C | -2.967803144 | 1.038420358  | -3.076462686 |
| C | -3.744112588 | 3.059142363  | -2.027027171 |
| C | -4.143298314 | 0.970087432  | -3.812447458 |
| H | -2.203011575 | 0.281926687  | -3.214925823 |
| C | -4.920730516 | 2.989807743  | -2.762174865 |
| H | -3.607175001 | 3.851464544  | -1.297321441 |
| C | -5.125947413 | 1.943780641  | -3.656521220 |
| H | -4.290239032 | 0.152353525  | -4.511989482 |
| H | -5.685529335 | 3.748866400  | -2.627065406 |
| H | -6.046054944 | 1.885527192  | -4.229817861 |
| C | -2.856725617 | -0.232934610 | 0.145594458  |
| C | -3.537224753 | -1.431248087 | 0.216351896  |
| C | -3.067506174 | -2.601544497 | -0.400886926 |
| C | -1.826168675 | -2.609279267 | -1.105237464 |
| C | -1.116558799 | -1.382490862 | -1.095023901 |
| C | -1.634234773 | -0.201987850 | -0.568127019 |
| C | -3.826512874 | -3.802292661 | -0.280679085 |
| C | -1.403558254 | -3.832634578 | -1.771468548 |
| C | -2.211018125 | -5.002668492 | -1.623536906 |
| C | -3.407668395 | -4.956959222 | -0.852456781 |
| C | -1.843866681 | -6.202890260 | -2.263219616 |
| H | -2.479135089 | -7.073872703 | -2.125863747 |
| C | -0.716798730 | -6.277042930 | -3.049498968 |
| C | 0.069310127  | -5.132024434 | -3.218622124 |
| C | -0.263464599 | -3.944281484 | -2.599053200 |
| H | -4.748434532 | -3.767858718 | 0.292131977  |
| H | -4.449543704 | -1.487034542 | 0.803086977  |
| H | -3.987637072 | -5.869620568 | -0.748726512 |
| H | -0.445728800 | -7.207597652 | -3.538485276 |
| H | 0.954635175  | -5.171705805 | -3.845830028 |
| H | 0.365781602  | -3.084375558 | -2.760397847 |
| C | -3.372111110 | 0.949814762  | 0.870646030  |

|   |              |              |              |
|---|--------------|--------------|--------------|
| C | -4.687201255 | 1.385296097  | 0.683665522  |
| C | -2.566208168 | 1.638101114  | 1.786719746  |
| C | -5.180143014 | 2.480488354  | 1.383880915  |
| H | -5.311469073 | 0.880457094  | -0.047221748 |
| C | -3.057484292 | 2.732986852  | 2.484579778  |
| H | -1.550307688 | 1.300603141  | 1.964710758  |
| C | -4.366584765 | 3.162704402  | 2.282451329  |
| H | -6.202960291 | 2.805454013  | 1.220208674  |
| H | -2.417612286 | 3.248477896  | 3.195271211  |
| H | -4.749838447 | 4.020841743  | 2.826349060  |
| P | 1.472275344  | -1.005185127 | -0.803074628 |
| O | 0.937232918  | 0.084349068  | 0.325656687  |
| O | 2.382128228  | -0.327979432 | -1.791252884 |
| O | 1.926228494  | -2.186491581 | -0.028444604 |
| O | 0.122777047  | -1.284284658 | -1.690570078 |
| C | 7.472084383  | -1.048883832 | -0.961104839 |
| C | 8.681447433  | -0.379447704 | -0.811047296 |
| C | 9.052150975  | 0.122483991  | 0.433621922  |
| C | 8.206474473  | -0.059104143 | 1.524048626  |
| C | 6.997242443  | -0.731264889 | 1.371411875  |
| C | 6.615341141  | -1.231693957 | 0.125590280  |
| H | 7.179636891  | -1.420790831 | -1.940143571 |
| H | 9.335083794  | -0.243574250 | -1.667322131 |
| H | 9.996052585  | 0.645873982  | 0.553563164  |
| H | 8.492019952  | 0.320847673  | 2.500859796  |
| H | 6.323683217  | -0.861331509 | 2.211685434  |
| C | 5.288154915  | -1.934534376 | -0.054290137 |
| O | 4.386687964  | -1.440263617 | 0.929033042  |
| H | 3.232047087  | 0.804082006  | -1.606618353 |
| C | 5.417774651  | -3.455250795 | 0.025844648  |
| H | 5.786668479  | -3.748537032 | 1.012421466  |
| H | 4.437026064  | -3.911386736 | -0.134720458 |
| H | 6.107813921  | -3.833418507 | -0.734922593 |
| H | 4.907713838  | -1.681417762 | -1.058212556 |
| H | 3.490220570  | -1.783267542 | 0.693131033  |
| C | 4.888986132  | 1.499678019  | -0.532745864 |
| C | 5.836378079  | 2.470222036  | -0.339399883 |
| C | 5.807806617  | 3.631210624  | -1.131342602 |
| C | 4.787820900  | 3.746612238  | -2.097412313 |
| C | 3.883706384  | 2.726385483  | -2.246262927 |
| N | 3.949518655  | 1.627429415  | -1.483346987 |
| H | 4.831195066  | 0.599983893  | 0.071652887  |
| H | 6.585581678  | 2.328013548  | 0.430959561  |
| H | 4.704351082  | 4.632839157  | -2.716174225 |
| H | 3.076296005  | 2.758708444  | -2.968556247 |
| N | 6.712125270  | 4.624970935  | -0.948008691 |
| H | 7.505574414  | 4.474514385  | -0.348659218 |
| H | 6.781913915  | 5.377399577  | -1.611013742 |

## DFT optimized coordinates of PO4-OH-NH3-S complex in xyz format

102

|   |              |              |              |
|---|--------------|--------------|--------------|
| C | -1.944424831 | 2.780549895  | -0.748646889 |
| C | -1.394058278 | 4.047385781  | -0.709143161 |
| C | -0.154833868 | 4.314503088  | -0.106647226 |
| C | 0.606912768  | 3.262380764  | 0.477269508  |
| C | 0.059346010  | 1.967771602  | 0.339748537  |
| C | -1.207659991 | 1.714915158  | -0.172800611 |
| C | 0.377948853  | 5.636658734  | -0.141558581 |
| C | 1.853534012  | 3.581935535  | 1.151499580  |
| C | 2.347742620  | 4.920164155  | 1.068991521  |
| C | 1.593279659  | 5.920323502  | 0.388066915  |
| C | 3.554045543  | 5.265757011  | 1.710477073  |
| H | 3.906269376  | 6.290934795  | 1.626870805  |
| C | 4.251294062  | 4.345913490  | 2.463301683  |
| C | 3.747207307  | 3.046540462  | 2.591065614  |
| C | 2.584093667  | 2.672544182  | 1.948613924  |
| H | -0.212472703 | 6.412267823  | -0.620412585 |
| H | -1.915161318 | 4.865590896  | -1.197792875 |
| H | 1.998831739  | 6.926478600  | 0.333629967  |
| H | 5.165494959  | 4.635649968  | 2.973136957  |
| H | 4.267570124  | 2.312224335  | 3.197115723  |
| H | 2.227713083  | 1.662573533  | 2.078133574  |
| C | -3.233191679 | 2.558760805  | -1.438714482 |
| C | -3.379230502 | 1.530216973  | -2.377685811 |
| C | -4.333053665 | 3.382765179  | -1.177396156 |
| C | -4.592912841 | 1.320074594  | -3.018340198 |
| H | -2.531123045 | 0.895587932  | -2.611581401 |
| C | -5.547034242 | 3.175083891  | -1.821513103 |
| H | -4.245301790 | 4.162862399  | -0.427346889 |
| C | -5.684281785 | 2.138087476  | -2.738765862 |
| H | -4.685058096 | 0.512702091  | -3.738480930 |
| H | -6.395395017 | 3.812308610  | -1.590185573 |
| H | -6.635628431 | 1.967201248  | -3.233750624 |
| C | -2.970083519 | 0.123615513  | 0.662749187  |
| C | -3.536547089 | -1.132883499 | 0.612522280  |
| C | -2.961513837 | -2.190311120 | -0.108764329 |
| C | -1.723544036 | -2.019033793 | -0.798735516 |
| C | -1.149545930 | -0.725714947 | -0.699708971 |
| C | -1.772758251 | 0.345314621  | -0.061222663 |
| C | -3.608070460 | -3.460229236 | -0.101832317 |
| C | -1.173219716 | -3.146644658 | -1.539469621 |
| C | -1.863684796 | -4.398602354 | -1.489318764 |
| C | -3.076255467 | -4.522593755 | -0.751670837 |
| C | -1.358448409 | -5.515403410 | -2.183688795 |
| H | -1.903960031 | -6.453112548 | -2.116869001 |
| C | -0.209871583 | -5.429692261 | -2.936821540 |
| C | 0.460056716  | -4.203904131 | -3.014636829 |
| C | -0.005838941 | -3.096311281 | -2.335069536 |
| H | -4.539711788 | -3.555371475 | 0.448391674  |
| H | -4.440586319 | -1.329793442 | 1.181110056  |
| H | -3.571874786 | -5.489106029 | -0.728372724 |
| H | 0.168123929  | -6.298199214 | -3.467042692 |
| H | 1.362296801  | -4.114798570 | -3.612750013 |
| H | 0.537777275  | -2.171134734 | -2.428000896 |
| C | -3.580831382 | 1.171177018  | 1.508549309  |

|   |              |              |              |
|---|--------------|--------------|--------------|
| C | -4.947749124 | 1.456102461  | 1.426345564  |
| C | -2.807437204 | 1.878477792  | 2.437216382  |
| C | -5.520341331 | 2.428735752  | 2.237420397  |
| H | -5.553807906 | 0.939214443  | 0.688037454  |
| C | -3.378269530 | 2.851236804  | 3.246468418  |
| H | -1.751294697 | 1.651259683  | 2.534569578  |
| C | -4.737912380 | 3.133783746  | 3.146917559  |
| H | -6.579679491 | 2.650687442  | 2.143066328  |
| H | -2.759146403 | 3.386661495  | 3.960033824  |
| H | -5.186501485 | 3.898196604  | 3.774156438  |
| P | 1.391084787  | -0.049161747 | -0.496113584 |
| O | 0.785919513  | 0.859817928  | 0.733133730  |
| O | 2.151406326  | 0.822901547  | -1.463305971 |
| O | 2.055094846  | -1.213314028 | 0.152839701  |
| O | 0.045163246  | -0.447388950 | -1.333170047 |
| C | 6.305967884  | -0.218804126 | 3.387102363  |
| C | 7.539745467  | 0.093637885  | 3.949502842  |
| C | 8.605488366  | -0.796347893 | 3.841664939  |
| C | 8.426696050  | -1.998717302 | 3.159406984  |
| C | 7.189337632  | -2.306985537 | 2.601520021  |
| C | 6.112465817  | -1.424527393 | 2.714039420  |
| H | 5.470239015  | 0.468369227  | 3.451467356  |
| H | 7.666389845  | 1.033007992  | 4.481854378  |
| H | 9.566394201  | -0.559179333 | 4.287694078  |
| H | 9.250215168  | -2.701902128 | 3.070770655  |
| H | 7.054813662  | -3.250643907 | 2.077254119  |
| C | 4.760066741  | -1.780773725 | 2.140058739  |
| O | 4.033425015  | -0.589913324 | 1.908448526  |
| H | 3.550805015  | 0.938282111  | -1.209127654 |
| C | 3.990312424  | -2.728878767 | 3.064858733  |
| H | 3.809740398  | -2.243194042 | 4.027783253  |
| H | 3.027170083  | -2.976233768 | 2.610097130  |
| H | 4.543144649  | -3.657429604 | 3.238644999  |
| H | 4.931403991  | -2.306088750 | 1.183838984  |
| H | 3.252282456  | -0.824502445 | 1.348192549  |
| C | 5.249877107  | -0.281069135 | -1.058882493 |
| C | 6.519727268  | -0.471778791 | -0.583748697 |
| C | 7.169994104  | 0.581408549  | 0.090301947  |
| C | 6.489121572  | 1.809522840  | 0.197697909  |
| C | 5.224515638  | 1.928922172  | -0.318645959 |
| N | 4.626156775  | 0.901565303  | -0.938139382 |
| H | 4.667996443  | -1.071492344 | -1.519679939 |
| H | 6.993464677  | -1.442646428 | -0.677508826 |
| H | 6.933635186  | 2.651470722  | 0.717117552  |
| H | 4.645162979  | 2.840300534  | -0.227451825 |
| N | 8.414034792  | 0.414124903  | 0.603535967  |
| H | 8.711938454  | -0.531179003 | 0.794799641  |
| H | 8.725371872  | 1.075483341  | 1.297410034  |

--- End of the supporting information: S. R. Chaudhari and S. Mogurampelly 2018 ---
